# Supplementary material for: Communicating trends in resistance using a drug resistance index
Source: PubMed Central journal article supplement — BMJ Open. 2011 Nov 14;1(2):e000135. doi: 10.1136/bmjopen-2011-000135 (PMC3221297; doi:10.1136/bmjopen-2011-000135), 2011-11-14

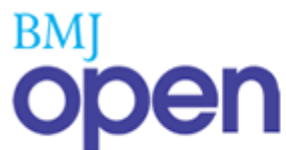

**COMMUNICATING TRENDS IN RESISTANCE:  
THE CASE FOR A DRUG RESISTANCE INDEX**

|                               |                                                                                                                                                                                                                                                                                                 |
|-------------------------------|-------------------------------------------------------------------------------------------------------------------------------------------------------------------------------------------------------------------------------------------------------------------------------------------------|
| Journal:                      | <i>BMJ Open</i>                                                                                                                                                                                                                                                                                 |
| Manuscript ID:                | bmjopen-2011-000135                                                                                                                                                                                                                                                                             |
| Article Type:                 | Research                                                                                                                                                                                                                                                                                        |
| Date Submitted by the Author: | 06-Apr-2011                                                                                                                                                                                                                                                                                     |
| Complete List of Authors:     | Laxminarayan, Ramanan; Center for Disease Dynamics, Economics and Policy<br>Grundmann, Hajo; Institute for Public Health and the Environment, Department of Infectious Disease Epidemiology<br>Klugman, Keith; Rollins School of Public Health, Hubert Department of Global Health Epidemiology |
| <b>Subject Heading</b>:       | Drugs and medicines                                                                                                                                                                                                                                                                             |
| Keywords:                     | Protocols & guidelines < HEALTH SERVICES ADMINISTRATION & MANAGEMENT, PUBLIC HEALTH, BACTERIOLOGY                                                                                                                                                                                               |
|                               |                                                                                                                                                                                                                                                                                                 |

SCHOLARONE™  
Manuscripts

only

1  
2  
3 COMMUNICATING TRENDS IN RESISTANCE:  
4  
5  
6 THE CASE FOR A DRUG RESISTANCE INDEX  
7  
8  
9

10  
11 RAMANAN LAXMINARAYAN, HAJO GRUNDMANN  
12

13  
14 AND KEITH P KLUGMAN  
15  
16  
17

18 Center for Disease Dynamics, Economics & Policy, Washington, DC (R Laxminarayan  
19  
20 PhD MPH); Princeton University (R Laxminarayan PhD MPH); MRC / Wits  
21  
22 Respiratory and Meningeal Pathogens Research Unit, Johannesburg, South Africa  
23  
24 (KP Klugman MD PhD); Hubert Department of Global Health, Emory University (KP  
25  
26 Klugman MD PhD); Dept. of Medical Microbiology, University Medical Centre  
27  
28 Groningen, Netherlands (Hajo Grundmann MD PhD); RIVM, National Institute for  
29  
30 Public Health and the Environment, Bilthoven, Netherlands (Hajo Grundmann MD  
31  
32 PhD)  
33  
34  
35  
36  
37  
38  
39

40 **Acknowledgments**  
41

42 The authors thank Michael Eber, Shawn Magnuson and Yolisa Nalule for excellent  
43  
44 research assistance and the Bill & Melinda Gates Foundation for financial support.  
45  
46 The views expressed in this paper do not necessarily reflect the views of those listed  
47  
48 above.  
49  
50  
51  
52  
53  
54  
55  
56  
57  
58  
59  
60

1  
2  
3 **Authors' addresses:** , Center for Disease Dynamics, Economics & Policy, 1616 P  
4 Street NW, Suite 600, Washington, DC 20036, Telephone: 202--328--5085, Fax: 202-  
5  
6 -939--3460, E--mail: [ramanan@cddep.org](mailto:ramanan@cddep.org).  
7  
8

9  
10 Hajo Grundmann, Dept. of Infectious Disease Epidemiology, Institute for Public  
11 Health and the Environment (RIVM), P.O. Box 1, 3720 BA Bilthoven, The  
12 Netherlands, Phone: + 31-30-274 4239, Fax: + 31-30-274 4409, Email:  
13 [hajo.grundmann@rivm.nl](mailto:hajo.grundmann@rivm.nl). Keith Klugman, Hubert Department of Global Health  
14 Epidemiology, Rollins School of Public Health, 1518 Clifton Road NE, Room 6005,  
15 Atlanta, GA 30322, Telephone: 404-712-9001, E-mail: [kklugma@emory.edu](mailto:kklugma@emory.edu).  
16  
17  
18  
19  
20  
21  
22  
23  
24  
25  
26

27 **Corresponding author:** , Center for Disease Dynamics, Economics & Policy, 1616 P  
28 Street NW, Suite 600, Washington, DC 20036, Telephone: 202--328--5085, Fax: 202-  
29  
30 -939--3460, E-mail: [ramanan@cddep.org](mailto:ramanan@cddep.org).  
31  
32  
33  
34  
35  
36

37 **Reprints:** Reprints are not available from authors.  
38  
39  
40

41 Left running head: LAXMINARAYAN AND OTHERS

42 Right running head: COMMUNICATING DRUG RESISTANCE: THE CASE FOR A  
43  
44

45 DRUG RESISTANCE INDEX  
46  
47

48 Word Count: 2,829 (including the Role of the funding source subsection)

49 Word Count (Abstract): 286  
50  
51

52 Tables: 0  
53

54 Figures: 5  
55

56 References: 5  
57  
58  
59  
60

## Abstract

**Objectives:** Antibiotic resistance is a growing problem worldwide, but communicating this challenge to policymakers and nonexperts is complicated by the multiplicity of bacterial pathogens and the distinct classes of antibiotics used to treat them. It is difficult, even for experts aware of the pharmacodynamics of antibiotics, to infer the seriousness of resistance without information on how commonly the antibiotic is being used and whether alternative antibiotics are available. Difficulty in aggregating resistance to multiple drugs to assess trends poses a further challenge to quantifying and communicating changes in resistance over time and across locations.

**Design:** We developed a method for aggregating bacterial resistance to multiple antibiotics, creating an index comparable to the composite economic indices that measure consumer prices and stock market values. The resulting drug resistance index and various subindices show antibiotic resistance and consumption trends in the United States, Latin America and Europe.

**Results:** The drug resistance index (DRI) based on use patterns in 1999 for *Escherichia coli* rose from 0.12 to 0.23 between 1999 and 2006. However, the adaptive DRI, which includes treatment of baseline resistant strains with alternative agents, climbed only from 0.12 to 0.15 during that period. In contrast, both the static-use and the adaptive DRIs for *Acinetobacter* spp. rose from 0.28 to 0.46 between 1999 and 2006.

1  
2  
3  
4  
5  
6 **Conclusion:** Divergence between the static-use and the adaptive-use DRIs for *E. coli*  
7  
8 reflects the ability of physicians to adapt to increasing resistance. However,  
9  
10 antibiotic use patterns did not change much in response to growing resistance to  
11  
12 *Acinetobacter* spp. because physicians were unable to adapt; new drugs for  
13  
14 *Acinetobacter* spp. are therefore needed. Composite indices that aggregate  
15  
16 resistance to various drugs can be useful for assessing changes in drug resistance  
17  
18 across time and space.  
19  
20  
21  
22  
23  
24

## 25 **Article Summary**

### 26 **Article focus:**

- 27 • We propose a drug resistance index that can be used to communicate gaps in  
28 antibiotic effectiveness to nonexperts.  
29

### 30 **Key messages:**

- 31 • Several different methods of computing DRI's are proposed. Data on bacterial  
32 susceptibility and antibiotic use can be used to compute a DRI on the  
33 proportion of antibiotics used to treat specific infections while data on  
34 anatomical site and type of infection can be used to create a DRI on infections  
35 defined by a specific anatomical site.  
36
- 37 • Data for the construction of DRI's are becoming increasingly available and  
38 the construction of DRI's will make trends in resistance intelligible to  
39 nonexperts and useful to experts.  
40  
41  
42  
43  
44  
45  
46  
47  
48  
49  
50  
51  
52  
53  
54  
55

### 56 **Strengths and limitations:**

- The robustness of the resistance index depends on the quality of surveillance systems that generate the underlying data on susceptibility and antibiotic use.
- It is most likely that an immediate application of DRIs may be at the scale of the hospital where data on both resistance and antibiotic use are likely to be available.
- Further steps can include tying the resistance index to estimates of actual disease burden.

**Funding:** This work was supported by the Global Antibiotic Resistance Partnership and the Bill & Melinda Gates Foundation.

### **Role of the Funding Source**

The institutions that supported this work had no role in study conception, data collection, analysis and interpretation, and writing of the manuscript. All authors had full access to the data. RL, HG and KK had the final responsibility for the decision to submit for publication.

### **Conflict of interest statement**

We declare that we have no conflict of interest.

## INTRODUCTION

That antibiotics are losing effectiveness around the world is by now clear not just to the medical profession but also to those following media stories on the rise of superbugs. However, efforts to effectively communicate the challenge of antibiotic resistance to the lay public and policymakers have been somewhat unsuccessful. Despite increased attention in the United States and Europe to the resistance problem, there has been little progress in allocating financial resources either to conserve the effectiveness of existing drugs or to incentivize the development of new antibiotics. As one journal editor put it, “it is time that antibiotic resistance became an issue of popular concern rather than the interest of a few experts” (McConnell 2004). Several reasons explain why this has not happened.

First, policymakers are largely unfamiliar with the scientific names of pathogens. To a policymaker, that susceptibility of *Streptococcus pneumoniae* to penicillin is 40% may carry little meaning.

Second, data on the resistance of a pathogen to one or more drugs may be viewed out of context if substitutes to treat the infection exist. In the United States, growing resistance of *E. coli* to trimethoprim-sulfamethoxazole has been accompanied by a reduction in the proportion of patients treated with that drug. How should we view the increase in resistance to drugs that are declining in use? Is resistance as critical when we have near-substitutes that clinicians can deploy, such as imipenem in the case of *E. coli*? If doctors use injectable cephalosporins a hundred times more often than they do penicillin to treat invasive infections caused by *Streptococcus*

1  
2  
3 *pneumoniae*, shouldn't resistance to those cephalosporins carry more weight than  
4  
5 resistance to penicillin?  
6  
7

8 Third, resistance goes up in some years and down in others, as seen in resistance  
9  
10 of *Staphylococcus aureus* to oxacillin (MRSA) in several European countries (ECDC  
11  
12 2009) and *Acinetobacter* spp. to ciprofloxacin. In aggregate, has resistance to the  
13  
14 antibiotics used most commonly to treat infections caused by these two pathogens  
15  
16 increased or decreased over time?  
17  
18  
19

20 Fourth is a problem specific to bacterial pathogens: antibiotic resistance affects  
21  
22 not a single disease, like HIV, TB or malaria, but rather a set of syndromes and  
23  
24 infections caused by different bacteria. A policymaker may understand that drugs to  
25  
26 treat HIV/AIDS are failing but be unable to grasp the complexity of bacterial  
27  
28 resistance. Therefore, information on susceptibility to a single pathogen and a single  
29  
30 antibiotic cannot inform priority setting and allocation of health resources.  
31  
32  
33

34 Here we propose a drug resistance index that can be used to communicate gaps  
35  
36 in antibiotic effectiveness to nonexperts. This index is based on economic metrics  
37  
38 like the consumer price indices or stock market indices, which are used in nearly  
39  
40 every country. The purpose of these indices is simple—to quantify the average cost  
41  
42 of purchasing a basic basket of goods and services deemed essential to living (in the  
43  
44 case of price indices) or the average price of a basket of shares being traded (in the  
45  
46 case of stock market indices). In our case, the metric should communicate the  
47  
48 average effectiveness of the set of antibiotics that are used to treat a given bacterial  
49  
50 infection.  
51  
52  
53  
54  
55  
56  
57  
58  
59  
60



## METHODS AND DATA

### *Drug Resistance Indices*

There are five attributes desirable in a drug resistance index (DRI). First, the DRI should be comparable across time and location so that it can be used to measure changes in drug effectiveness in a single country over time as well as to compare effectiveness across countries. Second, the DRI should be calculable with minimal data but be able to incorporate more information to improve precision when additional data become available. Third, the DRI should be simple enough that policymakers, the lay public and noninfectious disease medical practitioners can comprehend gaps in drug effectiveness, affordability and accessibility. Fourth, resistance of a pathogen to a specific drug should be weighted by the extent to which that drug is used for treating the pathogen, in much the same way that an inflation index weights the price of different commodities by the average share of income devoted to them. A change in the price of salt should affect the consumer price index by a smaller amount than an equal percentage change in the price of gasoline, which is used in greater quantities by the average household.

Finally, the resistance index should be sensitive to changes in the types of drugs being used. The first description of high-level resistance to ampicillin (beta-lactamase production) in *H. influenzae* (Khan, Ross et al. 1974) was sufficient to change empiric meningitis treatment from penicillin or ampicillin to the extended-spectrum cephalosporins in the developed world. Despite widespread beta-lactamase-producing *H. influenzae* and penicillin-resistant pneumococci, this shift has only recently begun in developing countries, as the extended-spectrum

1  
2  
3 cephalosporins come off patent and become affordable. The adaptive index for  
4  
5 treatment of meningitis remains low in the developed world and is much higher in  
6  
7 developing countries where alternative therapy thus remains limited in its  
8  
9 availability.  
10  
11

### 12 13 14 15 **Data**

16  
17  
18 Computing the DRI requires data on bacterial susceptibility and antibiotic use.  
19  
20 The scale at which these data are needed depends on the scale at which the  
21  
22 resistance index is being computed—as low as the level of an individual healthcare  
23  
24 facility or as high as a country or region. Ideally, resistance data are representative  
25  
26 at the level for which the index is being computed. The weighting data are estimates  
27  
28 of the shares of the different types of antibiotics as a proportion of treatments  
29  
30 provided for pathogens covered by the index. These weights are based on antibiotic  
31  
32 use data obtained from hospital pharmacies and commercial sources, such as IMS  
33  
34 Health. In places where detailed antibiotic use data are not available, structured  
35  
36 expert elicitation and other such methods can be used to elicit information on the  
37  
38 proportions of antibiotics used to treat specific infections (Cooke 1991). For  
39  
40 resistance indices related to infections defined by a specific anatomical site  
41  
42 (pneumonia, meningitis, sepsis, urinary tract infection, UTI, etc) additional data are  
43  
44 needed to weight each pathogen based on the etiologic fraction i.e. the proportion of  
45  
46 infections they cause.  
47  
48  
49  
50  
51  
52  
53  
54  
55  
56  
57  
58  
59  
60

### ***Example index***

The drug resistance index (DRI) measures changes through time in the proportion of disease-causing pathogens that are resistant to the antibiotics commonly used to treat them. For the purpose of exposition, we have constructed a DRI for two pathogens, *E. coli* and *Acinetobacter* spp., using national US data on the proportion of isolates tested that are resistant and antibiotic consumption. The annual percentage change in the DRI is a measure of the rate of depletion of antibiotic effectiveness.

Since antibiotic use may change over time in response to changing levels of antibiotic resistance, we compare trends in the index to the counterfactual case where antibiotic use remains fixed to a baseline year. A static-use DRI allows assessment of the extent to which drug use has adapted in response to resistance and the burden that this resistance would have caused if antibiotic use patterns had not changed:

$$(1) R_{i, \text{fixed-use}} = \sum_k \rho_{ik}^t q_{ik}^0$$

where  $\rho_{ik}^t$  is the proportion of resistance among organism  $i$  to drug  $k$  at time  $t$  and  $q_{ik}^0$  is the frequency of drug  $k$  used to treat organism  $i$  in the base year of the analysis.

Changing antibiotic use patterns over time may mitigate the burden of antibiotic resistance. To incorporate changing trends in antibiotic use, we also construct an adaptive version of the DRI; it aggregates the frequency with which infections from

1  
2  
3 a particular pathogen are resistant to antibiotic treatment and may be estimated as  
4  
5 follows:  
6  
7

$$(2) R_i = \sum_k \rho_{ik}^t q_{ik}^t$$

8  
9  
10  
11  
12 where  $\rho_{ik}^t$  is the proportion of resistance among organism  $i$  to drug  $k$  at time  $t$   
13  
14 and  $q_{ik}^t$  is the frequency of drug  $k$  used to treat organism  $i$  at time  $t$ .  
15  
16  
17  
18  
19  
20

### 21 ***Implementing the DRI using US data***

22  
23 Prevalence of resistance  $\rho_{ik}^t$  was calculated using The Surveillance Network  
24  
25 Database—USA. Frequency of drug use  $q_{ik}^0$  for the United States was obtained from  
26  
27 IMS Health. The Xponent database captures more than 70% of all prescriptions  
28  
29 filled in the United States and uses a patented projection methodology to represent  
30  
31 100% coverage of all prescription activity.  
32  
33  
34  
35

36  
37 Figures 1a and 1b show that resistance of *Escherichia coli* and *Acinetobacter* spp.  
38  
39 inpatient isolates in the United States increased between 1999 and 2006. Rates of  
40  
41 increase were remarkable for *Acinetobacter* spp. resistant to imipenem and  
42  
43 fluoroquinolones, as well as for *E. coli* resistant to ciprofloxacin and ampicillin.  
44  
45 Figures 2a and 2b show proportions of antibiotics used to treat *Acinetobacter* spp.  
46  
47 and *E. coli*. These use patterns reflect the resistance data. For *Acinetobacter* spp., the  
48  
49 predominant use is in injectable drugs, and our data show that most strains are  
50  
51 resistant to a majority of available antibiotics. The oral agents listed are  
52  
53 fluoroquinolones, and the replacement of ciprofloxacin by levofloxacin over this  
54  
55  
56  
57  
58  
59  
60

1  
2  
3 period may be related to changing hospital formularies, which used increasing  
4 amounts of levofloxacin despite its somewhat lesser activity than ciprofloxacin  
5  
6  
7  
8 against resistant Gram-negative species.  
9

10 For *E. coli*, reductions in the inexpensive oral agents ampicillin, trimethoprim-  
11 sulfamethoxazole and ciprofloxacin are mirrored by increasing resistance and use of  
12  
13 more expensive oral cephalosporins and expensive injectables, such as aztreonam.  
14  
15  
16  
17 Of particular note is the increasing use of the last-resort injectable imipenem.  
18

19  
20 Static-use and adaptive-use DRIs are in Figure 3. For *Acinetobacter* spp., the  
21  
22 static-use DRI increased more than 50%, from 0.28 to 0.46, while for *E. coli*, the  
23  
24 static-use DRI increased from 0.12 to 0.23. The results show that for *E. coli*, the  
25  
26 static-use DRI exceeds the adaptive-use DRI for all years, which increases only from  
27  
28 0.12 to 0.15. This rate of increase is much lower than for the static-use DRI,  
29  
30 indicating that clinicians were able to effectively adapt antibiotic use patterns in  
31  
32 response to trends in antibiotic resistance.  
33  
34  
35  
36

37 On the other hand, there is little difference between the static- and adaptive-use  
38  
39 indices for *Acinetobacter*. The similarity between the two indices suggests that there  
40  
41 is little room for clinicians to adapt antibiotic use patterns to decreasing treatment  
42  
43 effectiveness.  
44  
45  
46  
47  
48

### 49 ***DRIs for first-line therapy***

50  
51  
52 Clinicians and policymakers may be more concerned about resistance to first-line  
53  
54 treatments. Resistance to these drugs implies the loss of cheaper, more widely used  
55  
56 alternatives and could affect drug procurement budgets if government facilities are  
57  
58  
59  
60

an important source of treatment. Trends in resistance to first-line treatments may also be important for setting national treatment guidelines, essential drug lists or hospital formularies.

Resistance to second-line treatments could indicate that the need to invest in new antibiotics is more urgent. The line-of-treatment DRI is calculated as

$$(3) R_{i,n-line} = \frac{\sum_{k \in T_n} \rho_{ik}^t q_{ik}^t}{\sum_{k \in T_n} q_{ik}^t}$$

where  $T_n$  is the set of  $n$ -line treatments. From here on, for simplicity, we report only the adaptive form of the index. An important caveat is that when a single antibiotic corresponds to an entire line of therapy, the models are equivalent to summarizing trends in resistance to this antibiotic over time.

Over the period 1999–2006, drugs commonly used as first-line therapies for urinary tract infections (UTIs) included amoxicillin, trimethoprim-sulfamethoxazole (TMP-SMX), and fluoroquinolones. Results separating antibiotics into first-line and non-first-line categories follow for *E. coli* outpatient isolates. The adaptive-use index of resistance to first-line therapies was much higher than the resistance to other therapies—moreover, resistance to first-line therapies increased substantially over the analysis period. Resistance to non-first-line therapies decreased over time, suggesting that new treatment options among these non-first-line drugs increased overall treatment effectiveness.

### ***Affordability indices***

Antibiotic resistance may force clinicians to use more expensive antibiotics to treat infections. An affordability index summarizes resistance trends among cheaper or more expensive antibiotics. Such an index could mirror a first-line treatment index, but not always. A model of resistance of an organism to drugs in a certain cost range may be estimated as follows:

$$(4) R_{i,affordability} = \frac{\sum_k \rho_{ik}^t q_{ik}^t}{\sum_k q_{ik}^t} \mid price(k) \in C \subseteq C_{ALL}$$

where  $price(k)$  is the cost of treatment by drug  $k$  and  $C_{ALL}$  is the set of costs of treatment for each drug  $k$ .

### ***Other potential indices***

Clinicians do not usually have information on the infecting organism at start of empiric therapy, but they do have information on the site of infection. It would also be possible to set up indices based on the anatomical site and type of infection. Antibiotic use patterns would be straightforward, but resistance would have to be weighted against the etiological fraction of the different causative organisms.

Another potential index could contrast the relative drug effectiveness of Gram-positive vs. Gram-negative organisms. Similar indices could cover all pathogens in inpatient versus outpatient settings. Finally, although we have presented results for antibiotic resistance, similar indices can be computed for other infectious diseases,

1  
2  
3 like HIV/AIDS, tuberculosis and malaria, for which resistance is a problem and the  
4  
5 choice of therapeutics also varies over time.  
6  
7

8 For all indices discussed so far, subindices can be computed for different  
9  
10 categories and subcategories of pathogens, and then combined to produce the  
11  
12 overall index with weights reflecting their shares in the total of the antibiotics used  
13  
14 for treatment.  
15  
16  
17  
18  
19  
20

## 21 Discussion

22  
23 Antibiotic resistance imposes a substantial public health burden. Quantifying  
24  
25 overall changes in resistance over time and across locations is difficult because  
26  
27 resistance of pathogens to individual drugs must somehow be aggregated to assess  
28  
29 overall burden. Here, we take a first step towards the development of resistance  
30  
31 indices, summarizing resistance at the level of the infectious agent.  
32  
33  
34

35  
36 The results indicate that although clinicians have been able to adapt to increasing  
37  
38 resistance in *E. coli* by switching to antibiotics that remain active, as indicated by the  
39  
40 divergence between the static-use and adaptive DRI, they have had fewer  
41  
42 alternatives in the case of *Acinetobacter* spp., where resistance is increasing to  
43  
44 nearly all agents.  
45  
46  
47

48 Although we have not presented data by disease condition, *E. coli* represents the  
49  
50 vast majority of UTIs. Therefore, the DRI for *E. coli* is a useful proxy as a DRI for UTIs.  
51  
52 However, for other pathogens, infections in different sites of the body represent  
53  
54 different challenges and may not be well represented by a single index. For instance,  
55  
56 pneumococcal infection of the bloodstream or lungs may be a different challenge  
57  
58  
59  
60



1  
2  
3 than pneumococcal disease in cerebrospinal fluid, which few drugs penetrate. The  
4  
5 index should be based on the most recent and updated clinical breakpoints (S, I and  
6  
7 R). These take into account the clinical effectiveness of a drug for a given infection.  
8  
9 Clinical resistance in this context is determined by a careful analysis of all available  
10  
11 data by international committees such as the Clinical Laboratory Standards Institute  
12  
13 (CLSI, formerly NCCLS) in the USA and the European Committee on Antimicrobial  
14  
15 Susceptibility Testing (EUCAST). Thereby, the success of a given drug is defined not  
16  
17 only by the bacterium's susceptibility to the drug, but also by its pharmacology with  
18  
19 regards to the time course of the drug concentration in the human body  
20  
21 (pharmacokinetics) and the biological effect of the drug at these concentrations on  
22  
23 the bacteria (pharmacodynamics), and whenever available, by information on  
24  
25 clinical outcomes.  
26  
27  
28  
29  
30  
31

32  
33 Ultimately, the robustness of the resistance index will depend on the quality of  
34  
35 surveillance systems that generate the underlying data on susceptibility and  
36  
37 antibiotic use. Laboratory capacity remains inadequate in many parts of the world,  
38  
39 although surprisingly large amounts of quality data are generated but remain  
40  
41 underutilized due to the lack of dedicated surveillance systems. Susceptibility data  
42  
43 are more likely to be reported from largely tertiary care facilities, where problems  
44  
45 of resistance tend to be greater than in smaller, regional hospitals and could also  
46  
47 vary by time of specimen collection (Laupland, Ross et al. 2007). Thus, trends are  
48  
49 likely to be more accurate than absolute levels. However, data-related challenges  
50  
51 are not unique to resistance; they confront government agencies charged with  
52  
53 computing the consumer price index as well. DRIs could motivate better reporting  
54  
55  
56  
57  
58  
59  
60

1  
2  
3 of resistance data from smaller facilities and provide an impetus to surveillance in  
4  
5 both developed and developing countries.  
6  
7

8 National and regional data on antibiotic sales are increasingly available through  
9  
10 companies like IMS, although in some countries, hospital prescriptions are not  
11  
12 included. A more feasible, immediate application of DRIs may be at the scale of the  
13  
14 hospital, where data on both resistance and antibiotic use are likely to be available.  
15  
16

17  
18 The resistance index takes a first, important step towards making trends in  
19  
20 resistance intelligible to nonexperts and useful to experts. Policymakers,  
21  
22 particularly in developing countries, are interested in the implications of any public  
23  
24 health intervention for morbidity, mortality and current and future drug  
25  
26 procurement budgets. We need to translate susceptibility into metrics that  
27  
28 policymakers can understand and care about. A further step would be to tie the  
29  
30 resistance index to estimates of actual disease burden. For instance, how important  
31  
32 is resistance to *Acinetobacter*, which typically causes fewer infections or deaths than  
33  
34 *E. coli*? Translating the DRI into disease burden requires a careful, unbiased  
35  
36 assessment of clinical outcomes of resistant infections, but in absence of these data  
37  
38 morbidity and mortality rates of untreated infections may well suffice. Correlation  
39  
40 between resistance levels and severity of infection does not imply that the direction  
41  
42 of causality runs from resistance to poor outcomes. These and other methodological  
43  
44 challenges should be the subject of future efforts.  
45  
46  
47  
48  
49  
50  
51  
52  
53  
54

## 55 License

56  
57  
58  
59  
60

1  
2  
3 The Corresponding Author has the right to grant on behalf of all authors and does  
4 grant on behalf of all authors, an exclusive licence (or non exclusive for government  
5 employees) on a worldwide basis to the BMJ Publishing Group Ltd and its Licensees  
6 to permit this article (if accepted) to be published in BMJ editions and any other  
7 BMJ PGL products and sublicences to exploit all subsidiary rights, as set out in our  
8 licence ([http://resources.bmj.com/bmj/authors/checklists-forms/licence-for-](http://resources.bmj.com/bmj/authors/checklists-forms/licence-for-publication)  
9 [publication](http://resources.bmj.com/bmj/authors/checklists-forms/licence-for-publication)).  
10  
11  
12  
13  
14  
15  
16  
17  
18  
19  
20  
21  
22

### 23 **Contributors**

24 RL initiated and coordinated the research and conducted the analysis. RL wrote the  
25 manuscript and HG and KK reviewed and commented on the manuscript. All authors  
26 saw and approved the final version.  
27  
28  
29  
30  
31  
32  
33  
34  
35  
36  
37  
38  
39  
40  
41  
42  
43  
44  
45  
46  
47  
48  
49  
50  
51  
52  
53  
54  
55  
56  
57  
58  
59  
60

## References

- Cooke R. Experts in Uncertainty: Opinion and Subjective Probability in Science. Oxford: Oxford University Press; 1991.
- ECDC [Internet]. "Antimicrobial resistance surveillance in Europe 2009." Annual report of the European Antimicrobial Resistance Surveillance Network (EARS-Net). Stockholm: European Centre for Disease Prevention and Control ; 2010 [updated 2010 Nov 24; cited 2011 Jan 16]. Available from: [http://www.ecdc.europa.eu/en/publications/Publications/1011\\_SUR\\_annual\\_EARS\\_Net\\_2009.pdf](http://www.ecdc.europa.eu/en/publications/Publications/1011_SUR_annual_EARS_Net_2009.pdf)
- Khan W, Ross S, Rodriguez W, Controni G, and Saz AK . Haemophilus influenzae type B resistant to ampicillin. A report of two cases. *Jama*. 1974; **229**(3): 298-301.
- Laupland KB, Ross T, Pitout JD, Church DL, and Gregson DB. Investigation of sources of potential bias in laboratory surveillance for anti-microbial resistance. *Clin Invest Med*. 2007; **30**(4): E159-166.
- McConnell, J. Giving identity to the faceless threat of antibiotic resistance. *Lancet Infect Dis*. 2004 Jun; **4**(6): 325.

1  
2  
3  
4 Figure 1a: Resistance trends of *Acinetobacter* spp. to six antibiotics in US, 1999–  
5 2006  
6

7  
8 Figure 1b: Resistance trends of *Escherichia coli* to thirteen antibiotics in US, 1999–  
9 2006  
10

11  
12 Figure 2a: Proportions of most-common antibiotics used to treat infections caused  
13 by *Acinetobacter* spp. in US (1999–2006)  
14

15  
16 Figure 2b: Proportions of most-common antibiotics used to treat infections caused  
17 by *E. coli* in US, 1999–2006  
18

19  
20 Figure 3: Static- and adaptive use resistance indices for *Acinetobacter* spp. and *E. coli*  
21 for US, 1999–2006  
22

23  
24 Figure 4: Antibiotic effectiveness indices for first-line therapy for *Acinetobacter* spp.  
25 and *E. coli* in US, 1999–2006  
26

27  
28 Note: First-line therapies for urinary tract infections are based on guidelines used at  
29 the University of Maryland Medical Center.<sup>1</sup>  
30

31  
32 Figure 5: Adaptive affordability indices for *Acinetobacter* spp. and *E. coli* in US,  
33 1999–2006  
34

35  
36 Note: Cheap and expensive indices are based on daily cost at or under \$10 and  
37 exceeding \$10, respectively, in the case of *Escherichia coli*. For *E. coli*, cheap drugs  
38 include ampicillin, gentamicin and sulfamethoxazole-trimethoprim, cefazolin and  
39 tobramycin; expensive drugs include ampicillin/sulbactam, aztreonam, ceftazidime,  
40 ciprofloxacin, imipenem, nitrofurantoin, and piperacillin. Cheap and expensive  
41 indices are based on daily cost at or under \$100 and exceeding \$100, respectively, in  
42 the case of *Acinetobacter* species. For *Acinetobacter* spp., cheap drugs were cefepime,  
43 ceftazidime, ceftriaxone and ciprofloxacin; expensive drugs include imipenem. Daily  
44 drug cost data were obtained from Cornell University's Weill Medical College.<sup>2</sup>  
45  
46  
47  
48  
49  
50  
51  
52  
53  
54

55  
56 <sup>1</sup>[http://www.umm.edu/patiented/articles/how\\_antibiotics\\_used\\_treating\\_urinary\\_tract\\_infections\\_00036\\_8.htm](http://www.umm.edu/patiented/articles/how_antibiotics_used_treating_urinary_tract_infections_00036_8.htm).  
57

58 <sup>2</sup> <http://www-users.med.cornell.edu/~spon/picu/referenc/abxcost.htm>.  
59  
60

1  
2  
3  
4  
5  
6  
7  
8  
9  
10 April 5, 2011  
11  
12  
13

14 Dear Editor,  
15

16 The paper titled, "Communicating Trends in Resistance: The Case for a Drug Resistance  
17 Index", describes a new method for for evaluating and communicating drug resistance. The  
18 paper does not follow a specific reporting guideline as suggested by the options on your  
19 website.  
20  
21

22 Please feel free to contact us with any suggestions or questions.  
23  
24

25 Sincerely,  
26  
27

28  
29  
30  
31  
32  
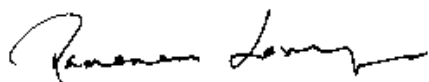

33 Ramanan Laxminarayan PhD MPH  
34 Senior Fellow and Director  
35  
36  
37  
38  
39  
40  
41  
42  
43  
44  
45  
46  
47  
48  
49  
50  
51  
52  
53  
54  
55  
56  
57  
58  
59  
60

Figure 1a: Resistance trends of *Acinetobacter* spp. to six antibiotics in US, 1999–2006

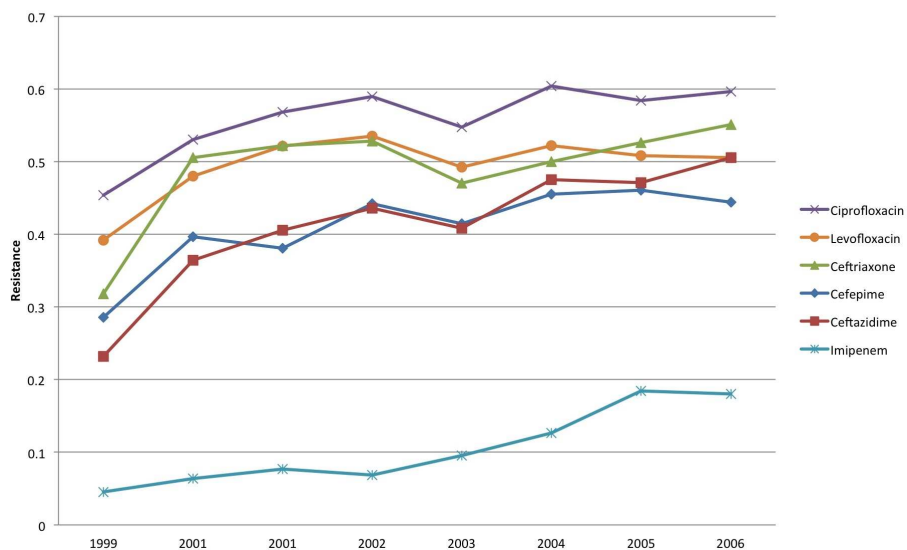

Figure 1a: Resistance trends of *Acinetobacter* spp. to six antibiotics in US, 1999–2006  
705x529mm (72 x 72 DPI)

Review only

1  
2  
3  
4  
5  
6  
7  
8  
9  
10  
11  
12  
13  
14  
15  
16  
17  
18  
19  
20  
21  
22  
23  
24  
25  
26  
27  
28  
29  
30  
31  
32  
33  
34  
35  
36  
37  
38  
39  
40  
41  
42  
43  
44  
45  
46  
47  
48  
49  
50  
51  
52  
53  
54  
55  
56  
57  
58  
59  
60

Figure 1b: Resistance trends of *E. coli* to thirteen antibiotics in US, 1999–2006

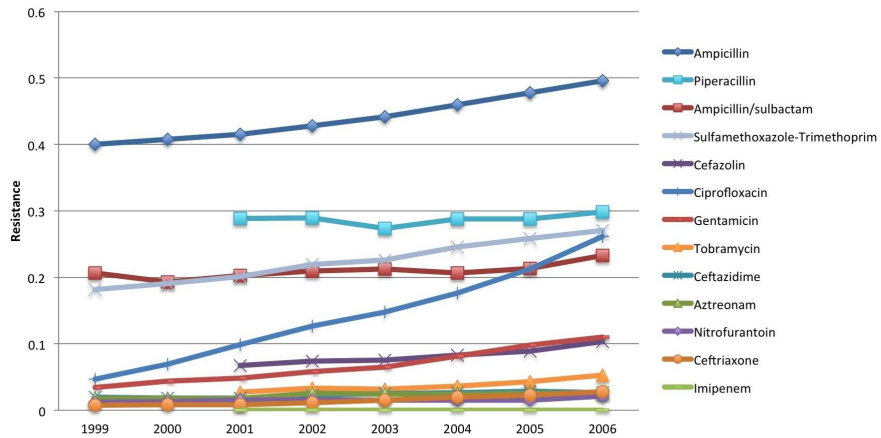

Figure 1b: Resistance trends of *Escherichia coli* to thirteen antibiotics in US, 1999–2006  
705x529mm (72 x 72 DPI)

Review only



1  
2  
3  
4  
5  
6  
7  
8  
9  
10  
11  
12  
13  
14  
15  
16  
17  
18  
19  
20  
21  
22  
23  
24  
25  
26  
27  
28  
29  
30  
31  
32  
33  
34  
35  
36  
37  
38  
39  
40  
41  
42  
43  
44  
45  
46  
47  
48  
49  
50  
51  
52  
53  
54  
55  
56  
57  
58  
59  
60

**Figure 2a: Proportions of most-common antibiotics used to treat infections caused by *Acinetobacter* spp. in US, 1999–2006**

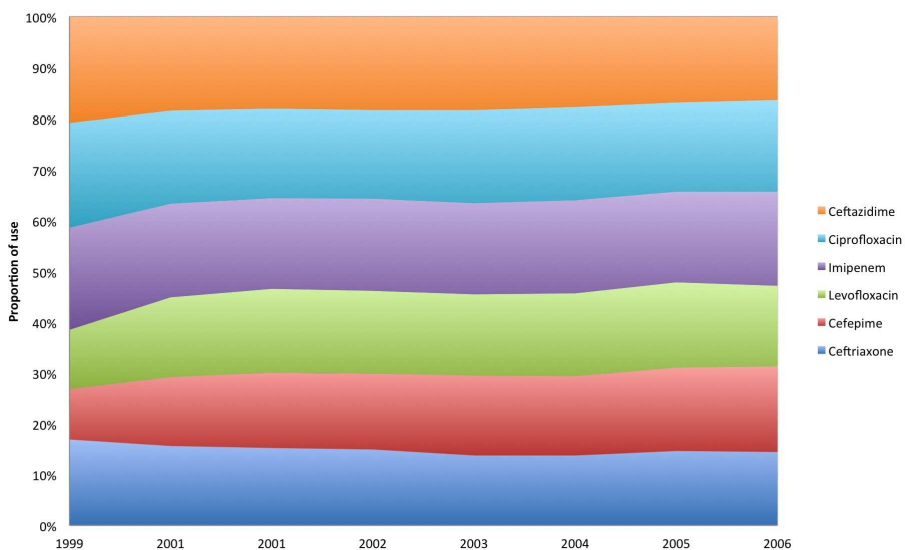

Figure 2a: Proportions of most-common antibiotics used to treat infections caused by *Acinetobacter* spp. in US (1999–2006)  
705x529mm (72 x 72 DPI)

Review only

1  
2  
3  
4  
5  
6  
7  
8  
9  
10  
11  
12  
13  
14  
15  
16  
17  
18  
19  
20  
21  
22  
23  
24  
25  
26  
27  
28  
29  
30  
31  
32  
33  
34  
35  
36  
37  
38  
39  
40  
41  
42  
43  
44  
45  
46  
47  
48  
49  
50  
51  
52  
53  
54  
55  
56  
57  
58  
59  
60

**Figure 2b: Proportions of most-common antibiotics used to treat infections caused by *E. coli* in US, 1999–2006**

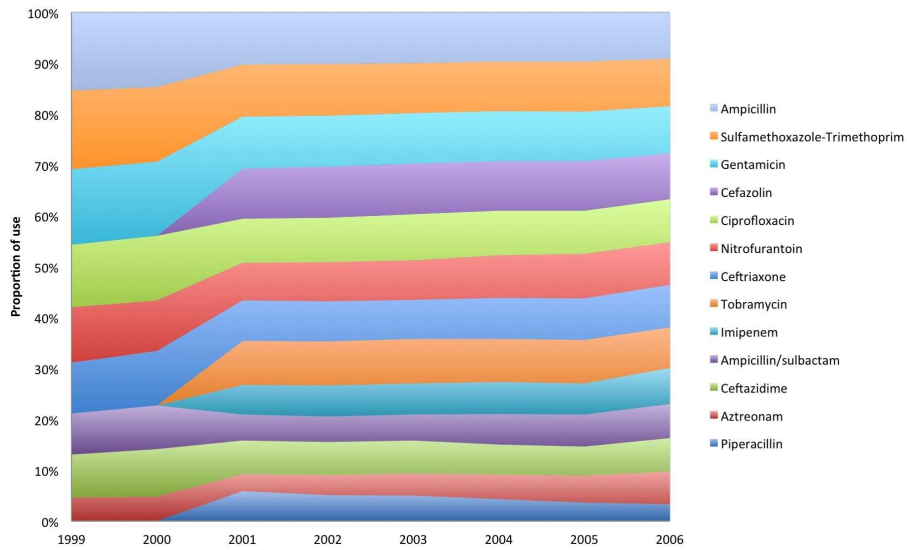

Figure 2b: Proportions of most-common antibiotics used to treat infections caused by *E. coli* in US, 1999–2006  
705x529mm (72 x 72 DPI)

Review only

1  
2  
3  
4  
5  
6  
7  
8  
9  
10  
11  
12  
13  
14  
15  
16  
17  
18  
19  
20  
21  
22  
23  
24  
25  
26  
27  
28  
29  
30  
31  
32  
33  
34  
35  
36  
37  
38  
39  
40  
41  
42  
43  
44  
45  
46  
47  
48  
49  
50  
51  
52  
53  
54  
55  
56  
57  
58  
59  
60

**Figure 3: Static- and adaptive use resistance indices for *E. coli* and *Acinetobacter* spp. in US, 1999–2006**

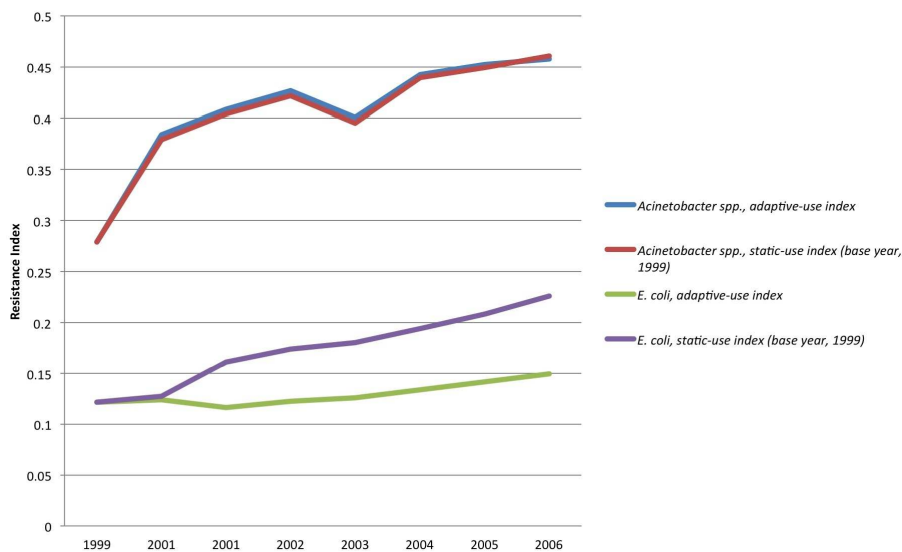

Figure 3: Static- and adaptive use resistance indices for *Acinetobacter* spp. and *E. coli* for US, 1999–2006  
705x529mm (72 x 72 DPI)

Review only

1  
2  
3  
4  
5  
6  
7  
8  
9  
10  
11  
12  
13  
14  
15  
16  
17  
18  
19  
20  
21  
22  
23  
24  
25  
26  
27  
28  
29  
30  
31  
32  
33  
34  
35  
36  
37  
38  
39  
40  
41  
42  
43  
44  
45  
46  
47  
48  
49  
50  
51  
52  
53  
54  
55  
56  
57  
58  
59  
60

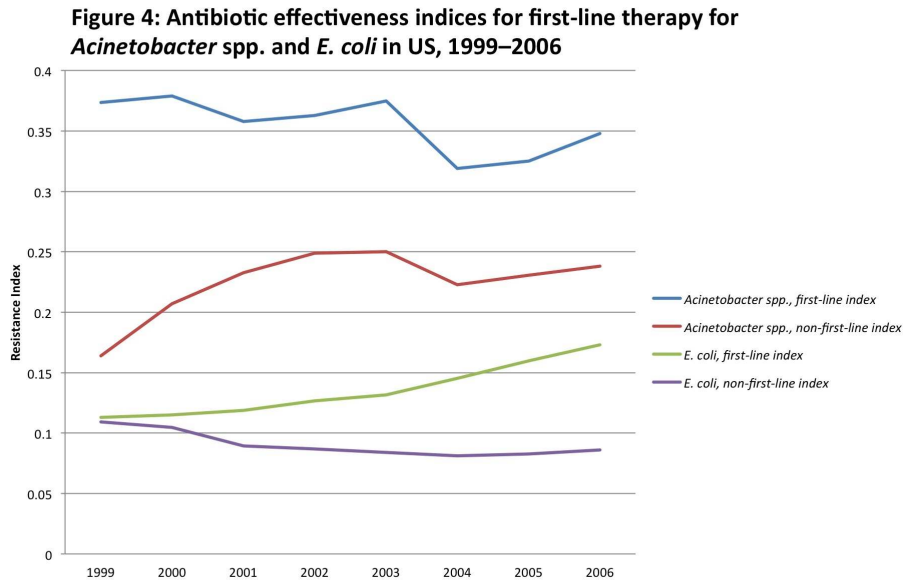

Figure 4: Antibiotic effectiveness indices for first-line therapy for *Acinetobacter* spp. and *E. coli* in US, 1999–2006  
705x529mm (72 x 72 DPI)

Review only

1  
2  
3  
4  
5  
6  
7  
8  
9  
10  
11  
12  
13  
14  
15  
16  
17  
18  
19  
20  
21  
22  
23  
24  
25  
26  
27  
28  
29  
30  
31  
32  
33  
34  
35  
36  
37  
38  
39  
40  
41  
42  
43  
44  
45  
46  
47  
48  
49  
50  
51  
52  
53  
54  
55  
56  
57  
58  
59  
60

**Figure 5: Adaptive affordability indices for *E. coli* and *Acinetobacter* spp. in US, 1999–2006**

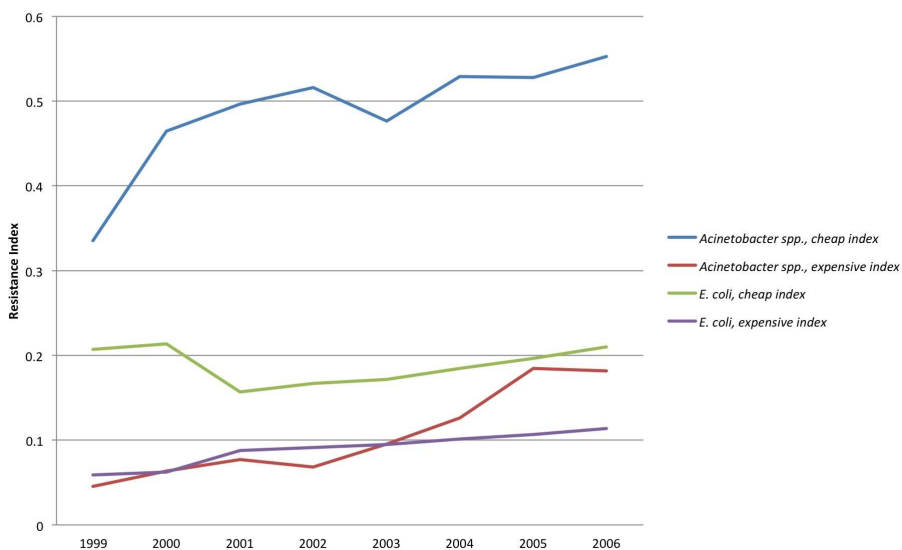

Figure 5: Adaptive affordability indices for *Acinetobacter* spp. and *E. coli* in US, 1999–2006  
705x529mm (72 x 72 DPI)

Review only

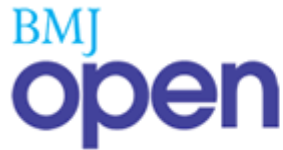

**COMMUNICATING TRENDS IN RESISTANCE  
USING A DRUG RESISTANCE INDEX**

|                                 |                                                                                                                                                                                                                                                                                                                                                                                                                                              |
|---------------------------------|----------------------------------------------------------------------------------------------------------------------------------------------------------------------------------------------------------------------------------------------------------------------------------------------------------------------------------------------------------------------------------------------------------------------------------------------|
| Journal:                        | <i>BMJ Open</i>                                                                                                                                                                                                                                                                                                                                                                                                                              |
| Manuscript ID:                  | bmjopen-2011-000135.R1                                                                                                                                                                                                                                                                                                                                                                                                                       |
| Article Type:                   | Research                                                                                                                                                                                                                                                                                                                                                                                                                                     |
| Date Submitted by the Author:   | 31-Aug-2011                                                                                                                                                                                                                                                                                                                                                                                                                                  |
| Complete List of Authors:       | Laxminarayan, Ramanan; Center for Disease Dynamics, Economics and Policy<br>Braykov, Nikolay; Center for Disease Dynamics, Economics and Policy<br>Megiddo, Itamar; Center for Disease Dynamics, Economics and Policy<br>Grundmann, Hajo; Institute for Public Health and the Environment, Department of Infectious Disease Epidemiology<br>Klugman, Keith; Rollins School of Public Health, Hubert Department of Global Health Epidemiology |
| <b>Primary Subject Heading</b>: | Drugs and medicines                                                                                                                                                                                                                                                                                                                                                                                                                          |
| Keywords:                       | Protocols & guidelines < HEALTH SERVICES ADMINISTRATION & MANAGEMENT, PUBLIC HEALTH, BACTERIOLOGY                                                                                                                                                                                                                                                                                                                                            |
|                                 |                                                                                                                                                                                                                                                                                                                                                                                                                                              |

SCHOLARONE™  
Manuscripts

Only

COMMUNICATING TRENDS IN RESISTANCE,

USING A DRUG RESISTANCE INDEX

RAMANAN LAXMINARAYAN, [NIKOLAY BRAYKOV](#), [ITAMAR MEGIDDO](#), HAJO GRUNDMANN,

AND KEITH P KLUGMAN

*Center for Disease Dynamics, Economics & Policy, Washington, DC* (R Laxminarayan PhD

MPH, [N Braykov BS and I Megiddo MS](#)); Princeton University (R Laxminarayan PhD MPH);

[Public Health, Foundation of India](#) (R. Laxminarayan PhD MPH); Dept. of Medical

Microbiology, University Medical Centre Groningen, Netherlands (Hajo Grundmann MD

PhD); RIVM, National Institute for Public Health and the Environment, Bilthoven,

Netherlands (Hajo Grundmann MD PhD); [MRC / Wits Respiratory and Meningeal](#)

[Pathogens Research Unit, Johannesburg, South Africa](#) (KP Klugman MD PhD); [Hubert](#)

[Department of Global Health, Emory University](#) (KP Klugman MD PhD)

Background

**Error! No bookmark name given.**

**Error! No bookmark name given.**

**Deleted:** :

**Deleted:** THE CASE FOR

**Deleted:** ¶

**Formatted:** Font: Italic

**Deleted:** MRC / Wits Respiratory and Meningeal Pathogens Research Unit, Johannesburg, South Africa (KP Klugman MD PhD); Hubert Department of Global

**Deleted:** , Emory University (KP Klugman MD PhD

**Deleted:** )

**Formatted:** Left

**Deleted:** Acknowledgments

**Deleted:** The authors thank Michael Eber, Shawn Magnuson and Yolisa Nalule for excellent research assistance and the Bill & Melinda Gates Foundation for financial support. The views expressed in this paper do not necessarily reflect the views of those listed above. ¶

¶

**Deleted:** Authors' addresses:

**Field Code Changed**

**Deleted:** Ramanan Laxminarayan

**Deleted:** , Center for Disease Dynamics, Economics & Policy, 1616 P Street NW, Suite 600, Washington, DC 20036, Telephone: 202--328--5085, Fax: 202--939--3460, E-mail: ramanan@cddep.org.

**Deleted:** Hajo Grundmann, Dept. of Infectious Disease Epidemiology, Institute for Public Health and the Environment (RIVM), P.O. Box 1, 3720 BA Bilthoven, The Netherlands, Phone: + 31-30-274 4239, Fax: + 31-30-274 4409, Email: [hajo.grundmann@rivm.nl](mailto:hajo.grundmann@rivm.nl). Keith Klugman, Hubert Department of Global Health Epidemiology, Rollins School of Public Health, 1518 Clifton Road NE, Room 6005, Atlanta, GA 30322, Telephone: 404-712-9001, E-mail: [kklugma@emory.edu](mailto:kklugma@emory.edu).

**Deleted:** ¶

**Corresponding author:**

**Field Code Changed**

**Deleted:** Ramanan Laxminarayan

**Deleted:** , Center for Disease Dynamics, Economics & Policy, 1616 P Street NW, Suite 600, Washington, DC 20036, Telephone: 202--328--5085, Fax: 202--939--3460, E-mail: [ramanan@cddep.org](mailto:ramanan@cddep.org). ¶

¶

**Reprints:** Reprints are not avail... [1]

Antibiotic resistance is a growing problem worldwide, but communicating this challenge to policymakers and nonexperts is complicated by the multiplicity of bacterial pathogens and the distinct classes of antibiotics used to treat them. It is difficult, even for experts aware of the pharmacodynamics of antibiotics, to infer the seriousness of resistance without information on how commonly the antibiotic is being used and whether alternative antibiotics are available. Difficulty in aggregating resistance to multiple drugs to assess trends poses a further challenge to quantifying and communicating changes in resistance over time and across locations.

**Deleted:** Right running head:  
COMMUNICATING DRUG RESISTANCE:  
THE CASE FOR A DRUG RESISTANCE  
INDEX ¶  
Word Count: 2,829 (including the Role  
of the funding source subsection)¶  
Word Count (Abstract): 286¶  
Tables: 0

**Deleted:** Figures: 5 ¶  
References: 5¶  
¶  
**Abstract**¶  
**Objectives**

**Methods:** We developed a method for aggregating bacterial resistance to multiple antibiotics, creating an index comparable to the composite economic indices that measure consumer prices and stock market values. The resulting drug resistance index and various subindices show antibiotic resistance and consumption trends in the United States, but can be applied at any geographical level.

**Deleted:** Design

**Deleted:** Latin America and Europe

**Findings:** The drug resistance index (DRI) based on use patterns in 1999 for *Escherichia coli* rose from 0.25 (95% CI 0.23 - 0.26) to 0.30 (95% CI 0.29 - 0.32) between 1999 and 2006. However, the adaptive DRI, which includes treatment of baseline resistant strains with alternative agents, climbed from 0.25 to 0.27 (95% CI 0.25 - 0.28) during that period. In contrast, both the static-use and the adaptive DRIs for *Acinetobacter* spp. rose from 0.41 (95% CI 0.4 - 0.42) to 0.48 (95% CI 0.46 - 0.49) between 1999 and 2006.

**Deleted:** Results

**Deleted:** 12

**Deleted:** 23

**Deleted:** only

**Deleted:** 12

**Deleted:** 15

**Deleted:** 28



**Interpretation:** Divergence between the static-use and the adaptive-use DRIs for *E. coli* reflects the ability of physicians to adapt to increasing resistance. However, antibiotic use patterns did not change much in response to growing resistance to *Acinetobacter* spp. because physicians were unable to adapt; new drugs for *Acinetobacter* spp. are therefore needed. Composite indices that aggregate resistance to various drugs can be useful for assessing changes in drug resistance across time and space.

**Funding:** This work was supported by the Global Antibiotic Resistance Partnership and the Bill & Melinda Gates Foundation.

**Left running head:** LAXMINARAYAN AND OTHERS

**Right running head:** COMMUNICATING TRENDS IN RESISTANCE USING A DRUG

**RESISTANCE INDEX**

**Tables:** 0

**Figures:** 5

**Word Count:** 2,990 (including the Role of the funding source subsection)

**References:** 7

**Deleted:** Conclusion

**Formatted:** Font: Bold

**Formatted:** Justified

**Deleted:** ¶  
**Article Summary**¶  
**Article focus:**¶

We propose a drug resistance index that can be used to communicate gaps in antibiotic effectiveness to nonexperts.¶

**Key messages:**¶

Several different methods of computing DRI's are proposed. Data on bacterial susceptibility and antibiotic use can be used to compute a DRI on the proportion of antibiotics used to treat specific infections while data on anatomical site and type of infection can be used to create a DRI on infections defined by a specific anatomical site. ¶

Data for the construction of DRI's are becoming increasingly available and the construction of DRI's will make trends in resistance intelligible to nonexperts and useful to experts.¶

**Strengths and limitations:**¶

The robustness of the resistance index depends on the quality of surveillance systems that generate the underlying data on susceptibility and antibiotic use. ¶

It is most likely that an immediate application of DRIs may be at the scale of the hospital where data on both resistance and antibiotic use are likely to be available. ¶

Further steps can include tying the resistance index to estimates of actual disease burden.¶

¶  
¶

**Formatted:** Font: Not Bold, Not Italic

**Formatted:** Normal, Line spacing: Double

**Deleted:** *Role of the Funding Source*

**Formatted:** Font: Italic

**Deleted:** The institutions that supported this work had no role in study conception, data collection, analysis and interpretation, and writing of the manuscript. All authors had full access to the data. RL, HG and KK had the final responsibility for the decision to submit for publication... [2]

**Deleted:** We declare that we have no conflict of interest.

**Formatted:** Left, Line spacing: single

**Formatted:** Indent: Left: 0 pt, Line spacing: single

## INTRODUCTION

That antibiotics are losing effectiveness around the world is by now clear not just to the medical profession but also to those following media stories on the rise of superbugs. However, efforts to effectively communicate the challenge of antibiotic resistance to the lay public and policymakers have been somewhat unsuccessful. Despite increased attention in the United States and Europe to the resistance problem, there has been little progress in allocating financial resources either to conserve the effectiveness of existing drugs or to incentivize the development of new antibiotics. As one journal editor put it, “it is time that antibiotic resistance became an issue of popular concern rather than the interest of a few experts” (McConnell 2004). Several reasons explain why this has not happened.

Deleted: (McConnell 2004).

First, policymakers are largely unfamiliar with the scientific names of pathogens. To a policymaker, that susceptibility of *Streptococcus pneumoniae* to penicillin is 40% may carry little meaning.

Second, data on the resistance of a pathogen to one or more drugs may be viewed out of context if substitutes to treat the infection exist. In the United States, growing resistance of *E. coli* to trimethoprim-sulfamethoxazole has been accompanied by a reduction in the proportion of patients treated with that drug. How should we view the increase in resistance to drugs that are declining in use? Is resistance as critical when we have near-substitutes that clinicians can deploy, such as imipenem in the case of *E. coli*? If doctors use injectable cephalosporins a hundred times more often than they do penicillin to treat invasive infections caused by *Streptococcus pneumoniae*, shouldn't resistance to those cephalosporins carry more weight than resistance to penicillin?

1  
2 Third, resistance goes up in some years and down in others, as seen in resistance of  
3  
4 *Staphylococcus aureus* to oxacillin (MRSA) in several European countries (ECDC 2009) and  
5  
6 *Acinetobacter* spp. to ciprofloxacin. In aggregate, has resistance to the antibiotics used most  
7  
8 commonly to treat infections caused by these two pathogens increased or decreased over  
9  
10 time?

11  
12 Fourth is a problem specific to bacterial pathogens: antibiotic resistance affects not a  
13  
14 single disease, like HIV, TB or malaria, but rather a set of syndromes and infections caused  
15  
16 by different bacteria. A policymaker may understand that drugs to treat HIV/AIDS are  
17  
18 failing but be unable to grasp the complexity of bacterial resistance. Therefore, information  
19  
20 on susceptibility to a single pathogen and a single antibiotic cannot inform priority setting  
21  
22 and allocation of health resources.  
23

24  
25 Here we propose a drug resistance index that can be used to communicate gaps in  
26  
27 antibiotic effectiveness to nonexperts. This index is based on economic metrics like the  
28  
29 consumer price indices or stock market indices, which are used in nearly every country.  
30  
31 The purpose of these indices is simple—to quantify the average cost of purchasing a basic  
32  
33 basket of goods and services deemed essential to living (in the case of price indices) or the  
34  
35 average price of a basket of shares being traded (in the case of stock market indices). In our  
36  
37 case, the metric should communicate the average effectiveness of the set of antibiotics that  
38  
39 are used to treat a given bacterial infection.  
40  
41

## 42 **METHODS AND DATA**

### 43 ***Drug Resistance Indices***

44  
45  
46  
47  
48  
49  
50  
51  
52  
53  
54  
55  
56  
57  
58  
59  
60

1  
2  
3  
4  
5  
6  
7  
8  
9  
10  
11  
12  
13  
14  
15  
16  
17  
18  
19  
20  
21  
22  
23  
24  
25  
26  
27  
28  
29  
30  
31  
32  
33  
34  
35  
36  
37  
38  
39  
40  
41  
42  
43  
44  
45  
46  
47  
48  
49  
50  
51  
52  
53  
54  
55  
56  
57  
58  
59  
60

There are five attributes desirable in a drug resistance index (DRI). First, the DRI should be comparable across time and location so that it can be used to measure changes in drug effectiveness in a single country over time as well as to compare effectiveness across countries. Second, the DRI should be calculable with minimal data but be able to incorporate more information to improve precision when additional data become available. Third, the DRI should be simple enough that policymakers, the lay public and noninfectious disease medical practitioners can comprehend gaps in drug effectiveness, affordability and accessibility. Fourth, resistance of a pathogen to a specific drug should be weighted by the extent to which that drug is used for treating the pathogen, in much the same way that an inflation index weights the price of different commodities by the average share of income devoted to them. A change in the price of salt should affect the consumer price index by a smaller amount than an equal percentage change in the price of gasoline, which is used in greater quantities by the average household.

Finally, the resistance index should be sensitive to changes in the types of drugs being used. The first description of high-level resistance to ampicillin (beta-lactamase production) in *H. influenzae* (Khan, Ross et al. 1974) was sufficient to change empiric meningitis treatment from penicillin or ampicillin to the extended-spectrum cephalosporins in the developed world. Despite widespread beta-lactamase-producing *H. influenzae* and penicillin-resistant pneumococci, this shift has only recently begun in developing countries, as the extended-spectrum cephalosporins come off patent and become affordable. The adaptive index for treatment of meningitis remains low in the developed world and is much higher in developing countries where alternative therapy thus remains limited in its availability.

Deleted: *influenzae* (Khan, Ross et al. 1974)

## Data

Computing the DRI requires data on bacterial susceptibility and antibiotic use. The scale at which these data are needed depends on the scale at which the resistance index is being computed—as low as the level of an individual healthcare facility or as high as a country or region. Ideally, resistance data are representative at the level for which the index is being computed. The weighting data are estimates of the shares of the different types of antibiotics as a proportion of treatments [indicated](#) for pathogens covered by the index.

Deleted: provided

These weights are based on antibiotic use data obtained from hospital pharmacies and commercial sources, such as IMS Health. In places where detailed antibiotic use data are not available, structured expert elicitation and other such methods can be used to elicit information on the proportions of antibiotics used to treat specific infections [\(Cooke 1991\)](#).

Deleted: (Cooke 1991).

For resistance indices related to infections defined by a specific anatomical site (pneumonia, meningitis, sepsis, urinary tract infection, UTI, etc) additional data are needed to weight each pathogen based on the etiologic fraction i.e. the proportion of infections they cause.

## *[Role of the Funding Source](#)*

Formatted: Font: Italic

[The institutions that supported this work had no role in study conception, data collection, analysis and interpretation, and writing of the manuscript. All authors had full access to the data. All authors had the final responsibility for the decision to submit for publication.](#)

**Example index**

The drug resistance index (DRI) measures changes through time in the proportion of disease-causing pathogens that are resistant to the antibiotics commonly used to treat them. For the purpose of exposition, we have constructed a DRI for two pathogens, *E. coli* and *Acinetobacter* spp., using national US data on the proportion of isolates tested that are resistant and antibiotic consumption. The annual percentage change in the DRI is a measure of the rate of depletion of antibiotic effectiveness.

Since antibiotic use may change over time in response to changing levels of antibiotic resistance, we compare trends in the index to the counterfactual case where antibiotic use remains fixed to a baseline year. A static-use DRI allows assessment of the extent to which drug use has adapted in response to resistance and the burden that this resistance would have caused if antibiotic use patterns had not changed:

$$R_{i, \text{fixed-use}} = \sum_k \rho_{ik}^t q_{ik}^0$$

where  $\rho_{ik}^t$  is the proportion of resistance among organism  $i$  to drug  $k$  at time  $t$  and  $q_{ik}^0$  is the frequency of drug  $k$  used to treat organism  $i$  in the base year of the analysis.

Changing antibiotic use patterns over time may mitigate the burden of antibiotic resistance. To incorporate changing trends in antibiotic use, we also construct an adaptive version of the DRI; it aggregates the frequency with which infections from a particular pathogen are resistant to antibiotic treatment and may be estimated as follows:

$$R_i = \sum_k \rho_{ik}^t q_{ik}^t$$

(1)  
~~Deleted:~~  $R_{i, \text{fixed-use}} = \sum_k \rho_{ik}^t q_{ik}^0$

**Formatted:** Do not check spelling or grammar, Lowered by 14 pt

**Formatted:** Font: Bold, Do not check spelling or grammar

1

**Formatted:** Do not check spelling or grammar, Lowered by 14 pt

~~Deleted:~~  $\rho_{ik}^t$

~~Deleted:~~  $i$

**Formatted:** Do not check spelling or grammar, Lowered by 3 pt

~~Deleted:~~  $k$

~~Deleted:~~  $q_{ik}^0$

**Formatted:** Do not check spelling or grammar, Lowered by 6 pt

**Formatted:** Do not check spelling or grammar, Lowered by 3 pt

**Formatted:** Do not check spelling or grammar, Lowered by 6 pt

~~Deleted:~~  $k$

~~Deleted:~~  $i$

**Formatted:** Do not check spelling or grammar, Lowered by 3 pt

**Formatted:** Do not check spelling or grammar, Lowered by 3 pt

~~Deleted:~~ (2)  $R_i = \sum_k \rho_{ik}^t q_{ik}^t$

~~Deleted:~~ 2

**Formatted:** Do not check spelling or grammar, Lowered by 14 pt

**Formatted:** Font: Bold, Do not check spelling or grammar

~~Deleted:~~ 2

**Formatted:** Do not check spelling or grammar, Lowered by 14 pt

where  $\rho_{ik}^t$  is the proportion of resistance among organism  $i$  to drug  $k$  at time  $t$  and  $q_{ik}^t$  is the frequency of drug  $k$  used to treat organism  $i$  at time  $t$ .

### Implementing the DRI using US data

Prevalence of resistance  $\rho_{ik}^t$  was calculated using The Surveillance Network Database - USA (TSN; Eurofins Medinet, Herndon, VA). TSN is a nationally and regionally representative database of bacterial species identification and antibiotic susceptibility results gathered from 300 US hospitals (Sahm et al. 1999). Frequency of drug use  $q_{ik}^0$  for the United States was obtained from IMS Health Xponent™ database. Xponent tracks more than 70% of all outpatient prescriptions in the United States using transaction records at retail pharmacies, and uses a patented projection methodology to represent 100% coverage of all prescription activity.

Confidence intervals for the indices were derived using a non-parametric bootstrap method with  $n = 10,000$  observations drawn at random from each of the itemized datasets of antibiotic prescriptions and individual susceptibility tests and replicated  $m = 1,000$  times. Statistical analysis was performed using STATA version 11 (Stata Corporation, College Station, Texas) and R version 2.13.1 (Free Software Foundation Inc, Boston, MA).

Figures 1a and 1b show that resistance of *Escherichia coli* and *Acinetobacter* spp. inpatient and outpatient isolates in the United States increased between 1999 and 2006. Rates of increase were remarkable for *Acinetobacter* spp. resistant to carbapenems and fluoroquinolones, as well as for *E. coli* resistant to fluoroquinolones, trimethoprim-sulfamethoxazole (TMP-SMX) and aminopenicillins. Figures 2a and 2b show prescribing

Deleted:  $\rho_{ik}^t$ 

Formatted: Do not check spelling or grammar, Lowered by 6 pt

Deleted:  $i$ 

Formatted: Do not check spelling or grammar, Lowered by 3 pt

Deleted:  $k$ 

Formatted: Do not check spelling or grammar, Lowered by 3 pt

Deleted:  $q_{ik}^t$ 

Formatted: Do not check spelling or grammar, Lowered by 6 pt

Deleted:  $k$ 

Formatted: Do not check spelling or grammar, Lowered by 3 pt

Deleted:  $i$ 

Formatted: Do not check spelling or grammar, Lowered by 3 pt

Deleted:  $\rho_{ik}^t$ 

Formatted: Do not check spelling or grammar, Lowered by 6 pt

Deleted: —

Deleted: .

Deleted:  $q_{ik}^0$ 

Formatted: Lowered by 6 pt

Deleted: .The

Deleted: captures

Formatted: Font: Not Italic

Formatted: Font: Not Italic

Deleted: filled

Formatted: Font: Not Italic

Formatted: Font: Not Italic

Deleted: imipenem

Deleted: ciprofloxacin

Deleted: ampicillin.

proportions for antibiotics that were featured in the TSN database of susceptibility tests for *Acinetobacter* spp. and *E. coli* and are commonly used to treat gram-negative infections. For *E. coli* usage patterns have shifted towards increased fluoroquinolone and later generation cephalosporin use in lieu of less expensive alternatives such as aminopenicillins and TMP-SMX.

Static-use and adaptive-use DRIs are in Figure 3. For *Acinetobacter* spp., the static-use DRI increased by 17%, from 0.41 to 0.48 while for *E. coli*, the static-use DRI increased from 0.25 to 0.30. The results show that for *E. coli*, the static-use DRI exceeds the adaptive-use DRI for all years, which increases from 0.12 to 0.15, 0.25 to 0.27 from 1999 to 2006. This rate of increase is much lower than for the static-use DRI with a statistically significant difference for 2006, indicating that clinicians were able to effectively adapt antibiotic use patterns in response to trends in antibiotic resistance.

On the other hand, there is little difference between the static- and adaptive-use indices for *Acinetobacter*. The similarity between the two indices suggests that there is little room for clinicians to adapt antibiotic use patterns to decreasing treatment effectiveness.

***DRIs for first-line therapy***

Clinicians and policymakers may be more concerned about resistance to first-line treatments. Resistance to these drugs implies the loss of cheaper, more widely used alternatives and could affect drug procurement budgets if government facilities are an important source of treatment. Trends in resistance to first-line treatments may also be important for setting national treatment guidelines, essential drug lists or hospital formularies.

**Deleted:** of

**Deleted:** used to treat

**Deleted:** and *E. coli*. These use

**Deleted:** reflect the resistance data. For *Acinetobacter* spp., the predominant use is in injectable drugs, and our data show that most strains are resistant to a majority

**Deleted:** available antibiotics. The oral agents listed are fluoroquinolones, and the replacement of ciprofloxacin by levofloxacin over this period may be related to changing hospital formularies, which used increasing amounts of levofloxacin despite its somewhat lesser activity than ciprofloxacin against resistant Gram-negative species.¶ For *E. coli*, reductions in the inexpensive oral agents ampicillin, trimethoprim-sulfamethoxazole and ciprofloxacin are mirrored by increasing resistance and use of more

**Deleted:** oral cephalosporins and expensive injectables,

**Deleted:** aztreonam. Of particular note is the increasing use of the last-resort injectable imipenem

**Formatted:** Strikethrough

**Deleted:** more than 50

**Deleted:** 28

**Deleted:** 46,

**Deleted:** 12

**Deleted:** 23

**Deleted:** only

**Deleted:** .

**Formatted:** Font: Not Italic, Strikethrough

**Formatted:** Font: Not Italic, Strikethrough



Resistance to second-line treatments could indicate that the need to invest in new antibiotics is more urgent. The line-of-treatment DRI is calculated as

$$(0) R_{i,n-line} = \frac{\sum_{k \in T_n} \rho_{ik}^t q_{ik}^t}{\sum_{k \in T_n} q_{ik}^t}$$

where  $T_n$  is the set of  $n$ -line treatments. From here on, for simplicity, we report only the adaptive form of the index for *E.coli*. An important caveat is that when a single antibiotic corresponds to an entire line of therapy, the models are equivalent to summarizing trends in resistance to this antibiotic over time.

Over the period 1999–2006, drugs commonly used as first-line therapies for urinary tract infections (UTIs) included trimethoprim-sulfamethoxazole (TMP-SMX) and fluoroquinolones (Taur and Smith, 2007). Results separating antibiotics into first-line and non-first-line categories follow for *E. coli* isolates. The adaptive-use index of resistance to first-line therapies was lower than the resistance to other therapies (figure 4). However, resistance to first-line therapies increased at a much higher rate, a likely consequence of their widespread use. Resistance to non-first-line therapies remained unchanged over time, suggesting that new treatment options among these non-first-line drugs preserved their overall effectiveness.

### Affordability indices

Antibiotic resistance may force clinicians to use more expensive antibiotics to treat infections. An affordability index summarizes resistance trends among cheaper or more

Deleted: (3)

$$R_{i,n-line} = \frac{\sum_{k \in T_n} \rho_{ik}^t q_{ik}^t}{\sum_{k \in T_n} q_{ik}^t} \uparrow$$

Formatted: Font: Bold, Do not check spelling or grammar, Lowered by 25 pt

Deleted: 3

Formatted: Font: Bold, Do not check spelling or grammar

Formatted: Font: Bold, Do not check spelling or grammar, Lowered by 25 pt

Deleted:  $T_n$

Formatted: Do not check spelling or grammar, Lowered by 6 pt

Deleted: amoxicillin

Deleted: ),

Deleted: .

Deleted: outpatient

Deleted: much higher

Deleted: —moreover

Deleted: substantially over the analysis period.

Deleted: decreased

Deleted: increased

Deleted: treatment

Deleted:

Formatted: Font: Bold, Italic

Formatted: Font: Bold, Italic, Do not check spelling or grammar

expensive antibiotics. Such an index could mirror a first-line treatment index, but not always. A model of resistance of an organism to drugs in a certain cost range may be estimated as follows:

$$(0) R_{i,affordability} = \frac{\sum_k \rho_{ik}^t q_{ik}^t}{\sum_k q_{ik}^t} \mid price(k) \in C \subseteq C_{ALL}$$

where  $price(k)$  is the cost of treatment by drug  $k$  and  $C_{ALL}$  is the set of costs of treatment

for each drug  $k$ .

The adaptive DRI for high cost drugs used to treat *E coli* was lower indicating overall lower levels of resistance to higher cost drugs (figure 5). However, there was an upward trend in the adaptive index for higher cost drugs indicating that as resistance increased, there was a limited set of higher cost-drugs that physicians could prescribe leading to an increasing DRI. Interestingly, the low-cost adaptive DRI for *E coli* has remained relatively flat, consistent with the overall unchanged trend in DRI for *E coli*.

### **Other potential indices**

Clinicians do not usually have information on the infecting organism at start of empiric therapy, but they do have information on the site of infection. It would also be possible to set up indices based on the anatomical site and type of infection. Antibiotic use patterns would be straightforward, but resistance would have to be weighted against the etiological fraction of the different causative organisms.

Another potential index could contrast the relative drug effectiveness of Gram-positive vs. Gram-negative organisms.—Similar indices could cover all pathogens in inpatient versus

Deleted: (4)

$$R_{i,affordability} = \frac{\sum_k \rho_{ik}^t q_{ik}^t}{\sum_k q_{ik}^t} \mid price(k)$$

Formatted: Do not check spelling or grammar, Lowered by 23 pt

Deleted: 4

Formatted: Font: Bold, Do not check spelling or grammar

Formatted: Do not check spelling or grammar, Lowered by 23 pt

Deleted:  $price(k)$

Deleted:  $k$

Formatted: Do not check spelling or grammar, Lowered by 3 pt

Deleted:  $C_{ALL}$

Formatted: Do not check spelling or grammar, Lowered by 5 pt

Formatted: Do not check spelling or grammar, Lowered by 6 pt

Deleted:  $k$ .

Formatted: Do not check spelling or grammar, Lowered by 3 pt

Formatted: Do not check spelling or grammar, Lowered by 3 pt

1  
2 outpatient settings. Finally, although we have presented results for antibiotic resistance,  
3  
4 similar indices can be computed for other infectious diseases, like HIV/AIDS, tuberculosis  
5  
6 and malaria, for which resistance is a problem and the choice of therapeutics also varies  
7  
8 over time.  
9

10 For all indices discussed so far, subindices can be computed for different categories and  
11  
12 subcategories of pathogens, and then combined to produce the overall index with weights  
13  
14 reflecting their shares in the total of the antibiotics used for treatment.  
15  
16  
17  
18  
19

## 20 Discussion

21 Antibiotic resistance imposes a substantial public health burden. Quantifying overall  
22  
23 changes in resistance over time and across locations is difficult because resistance of  
24  
25 pathogens to individual drugs must be aggregated to assess overall burden. Here, we take a  
26  
27 first step towards the development of resistance indices, summarizing resistance at the  
28  
29 level of the infectious agent.  
30

Deleted: somehow

31 The results indicate that although clinicians have been able to adapt to increasing  
32  
33 resistance in *E. coli* by switching to antibiotics that remain active, as indicated by the  
34  
35 divergence between the static-use and adaptive DRI, they have had fewer alternatives in  
36  
37 the case of *Acinetobacter* spp., where resistance is increasing to nearly all agents.  
38  
39

40 Although we have not presented data by disease condition, *E. coli* represents the vast  
41  
42 majority of UTIs. Therefore, the DRI for *E. coli* is a useful proxy as a DRI for UTIs. However,  
43  
44 for other pathogens, infections in different sites of the body represent different challenges  
45  
46 and may not be well represented by a single index. For instance, pneumococcal infection of  
47  
48 the bloodstream or lungs may be a different challenge than pneumococcal disease in  
49  
50  
51  
52  
53  
54  
55  
56  
57  
58  
59  
60

1  
2  
3  
4  
5  
6  
7  
8  
9  
10  
11  
12  
13  
14  
15  
16  
17  
18  
19  
20  
21  
22  
23  
24  
25  
26  
27  
28  
29  
30  
31  
32  
33  
34  
35  
36  
37  
38  
39  
40  
41  
42  
43  
44  
45  
46  
47  
48  
49  
50  
51  
52  
53  
54  
55  
56  
57  
58  
59  
60

cerebrospinal fluid, which few drugs penetrate. The index should be based on the most recent and updated clinical breakpoints (S, I and R). These take into account the clinical effectiveness of a drug for a given infection. Clinical resistance in this context is determined by a careful analysis of all available data by international committees such as the Clinical Laboratory Standards Institute (CLSI, formerly NCCLS) in the USA and the European Committee on Antimicrobial Susceptibility Testing (EUCAST). Thereby, the success of a given drug is defined not only by the bacterium's susceptibility to the drug, but also by its pharmacology with regards to the time course of the drug concentration in the human body (pharmacokinetics) and the biological effect of the drug at these concentrations on the bacteria (pharmacodynamics), and whenever available, by information on clinical outcomes.

Ultimately, the robustness of the resistance index will depend on the quality of surveillance systems that generate the underlying data on susceptibility and antibiotic use. Laboratory capacity remains inadequate in many parts of the world, although surprisingly large amounts of quality data are generated but remain underutilized due to the lack of dedicated surveillance systems. Susceptibility data are more likely to be reported from largely tertiary care facilities, where problems of resistance tend to be greater than in smaller, regional hospitals and could also vary by time of specimen collection ([Laupland, Ross et al. 2007](#)). Thus, trends are likely to be more accurate than absolute levels. However, data-related challenges are not unique to resistance; they confront government agencies charged with computing the consumer price index as well. DRIs could motivate better reporting of resistance data from smaller facilities and provide an impetus to surveillance in both developed and developing countries.

Deleted: (Laupland, Ross et al. 2007).

1  
2 National and regional data on antibiotic sales are increasingly available through  
3  
4 companies like IMS [Health](#), although in some countries, hospital prescriptions are not  
5  
6 included. [Gathering accurate data on antibiotic sales is particularly challenging in countries](#)  
7  
8 [with a large informal pharmaceutical sector. Here, sales from the formal sector may be](#)  
9  
10 [indicative of trends and likely mirror sales in the informal sector. A](#) feasible, immediate  
11  
12 application of DRIs may be at the scale of the hospital, where data on both resistance and  
13  
14 antibiotic use are likely to be available.  
15

Deleted: A more

16  
17 The resistance index takes a first, important step towards making trends in resistance  
18  
19 intelligible to nonexperts and useful to experts. Policymakers, particularly in developing  
20  
21 countries, are interested in the implications of any public health intervention for morbidity,  
22  
23 mortality and current and future drug procurement budgets. We need to translate  
24  
25 susceptibility into metrics that policymakers can understand and care about. A further step  
26  
27 would be to tie the resistance index to estimates of actual disease burden. For instance,  
28  
29 how important is resistance to *Acinetobacter*, which typically causes fewer infections or  
30  
31 deaths than *E. coli*? Translating the DRI into disease burden requires a careful, unbiased  
32  
33 assessment of clinical outcomes of resistant infections, but in absence of these data  
34  
35 morbidity and mortality rates of untreated infections may well suffice. Correlation  
36  
37 between resistance levels and severity of infection does not imply that the direction of  
38  
39 causality runs from resistance to poor outcomes. These and other methodological  
40  
41 challenges should be the subject of future efforts.  
42

Formatted: Font: Bold

43  
44  
45 **[Conflict of interest statement](#)**

46  
47 [We declare that we have no conflict of interest.](#)  
48  
49  
50  
51  
52  
53  
54  
55  
56  
57  
58  
59  
60

## Contributors

RL initiated the research. RL and KK coordinated the research. RL conducted the analysis.

RL and KK wrote the manuscript. Both authors saw and approved the final version.

## Acknowledgments

The authors thank Nikolay Braykov, Michael Eber, Eili Klein, Shawn Magnuson, Itamar Megiddo, and Yolisa Nalule for excellent research assistance. Hajo Grundmann provided useful comments. Research time for RL was supported by grants from the Robert Wood Johnson Foundation and the Bill & Melinda Gates. The views expressed in this paper do not necessarily reflect the views of those listed above. The statements, findings, conclusions, views and opinions contained and expressed herein are based in part on data obtained under license from the following IMS Health Incorporated information service: Xponent™, January 1999-December 2006, IMS Health Incorporated. All rights reserved.

Such statements, findings, conclusions, views and opinions are not necessarily those of IMS Health Incorporated or any of its affiliated or subsidiary entities.

Authors' addresses: **Error! Reference source not found.** Center for Disease Dynamics, Economics & Policy, 1616 P Street NW, Suite 600, Washington, DC 20036, Telephone: 202--328--5085, Fax: 202--939--3460, E--mail: ramanan@cddep.org.

Nikolay Braykov, Center for Disease Dynamics, Economics & Policy, 1616 P Street NW, Suite 600, Washington, DC 20036, Telephone: 202--328--5170, Fax: 202--939--3460, E--mail: braykov@cddep.org.

### Deleted: License¶

The Corresponding Author has the right to grant on behalf of all authors and does grant on behalf of all authors, an exclusive licence (or non exclusive for government employees) on a worldwide basis to the BMJ Publishing Group Ltd and its Licensees to permit this article (if accepted) to be published in BMJ editions and any other BMJPG products and sublicences to exploit all subsidiary rights, as set out in our licence (<http://resources.bmj.com/bmj/authors/checklists-forms/licence-for-publication>).

**Formatted:** Font: Bold, Font color: Auto

**Formatted:** Font: Cambria, 12 pt, Not Italic

**Formatted:** Left

**Deleted:** RL initiated and coordinated the research. RL, NB and IM conducted the analysis. RL wrote the manuscript and with assistance from HG and KK reviewed and commented on the manuscript. NB and IM provided comments. All authors saw and approved the final version. ¶

**Formatted:** Font: Not Italic

**Formatted:** Font: Cambria, 12 pt, Not Italic

**Formatted:** Font: Cambria, Not Italic

**Formatted:** Font: Cambria, 12 pt, Not Italic

**Deleted:** The authors thank Michael Eber, Eili Klein, Shawn Magnuson and Yolisa Nalule for excellent research assistance. Research time for RL, NB and IM was supported by grants from the Robert Wood Johnson Foundation and the Bill & Melinda Gates. The views expressed in this paper do not necessarily reflect the views of those listed above. The statements, findings, conclusions, views and opinions contained and expressed herein are based in part on data obtained under license from the following IMS Health Incorporated information service: Xponent™, January 1999-December 2006, IMS Health Incorporated. All rights reserved. Such statements, findings, conclusions, views and opinions are not necessarily those of IMS Health Incorporated or any of its affiliated or subsidiary entities. ¶

**Field Code Changed**

**Deleted:** Ramanan Laxminarayan

1  
2 [Itamar Megiddo, Center for Disease Dynamics, Economics & Policy, 1616 P Street NW, Suite](#)  
3  
4 [600, Washington, DC 20036, Telephone: 202--328--5197, Fax: 202--939--3460, E--mail:](#)  
5  
6 [megiddo@cddep.org](mailto:megiddo@cddep.org).

7  
8  
9  
10 [Hajo Grundmann, Dept. of Infectious Disease Epidemiology, Institute for Public Health and](#)  
11  
12 [the Environment \(RIVM\), P.O. Box 1, 3720 BA Bilthoven, The Netherlands, Phone: + 31-30-](#)  
13  
14 [274 4239, Fax: + 31-30-274 4409, Email: hajo.grundmann@rivm.nl](#).

15  
16 [Keith Klugman, Hubert Department of Global Health Epidemiology, Rollins School of Public](#)  
17  
18 [Health, 1518 Clifton Road NE, Room 6005, Atlanta, GA 30322, Telephone: 404-712-9001, E-](#)  
19  
20 [mail: kklugma@emory.edu](mailto:kklugma@emory.edu).

21  
22  
23  
24 **Corresponding author:** ~~Error! Reference source not found,~~ [Center for Disease](#)  
25  
26 [Dynamics, Economics & Policy, 1616 P Street NW, Suite 600, Washington, DC 20036,](#)  
27  
28 [Telephone: 202--328--5085, Fax: 202--939--3460, E--mail: ramanan@cddep.org](#).

Deleted: ¶

Field Code Changed

Deleted: Ramanan Laxminarayan

References

[Cooke, R. \(1991\). \*Experts in Uncertainty: Opinion and Subjective Probability in Science\*. Oxford, Oxford University Press.](#)

[ECDC. \(2010\). "Antimicrobial resistance surveillance in Europe 2009." Annual report of the European Antimicrobial Resistance Surveillance Network \(EARS-Net\). Stockholm, ECDC. Accessed January 16, 2011 \[http://www.ecdc.europa.eu/en/publications/Publications/1011\\\_SUR\\\_annual\\\_EARS\\\_Net\\\_2009.pdf\]\(http://www.ecdc.europa.eu/en/publications/Publications/1011\_SUR\_annual\_EARS\_Net\_2009.pdf\)](#)

[Khan, W., S. Ross, et al. \(1974\). "Haemophilus influenzae type B resistant to ampicillin. A report of two cases." \*Jama\* \*\*229\*\*\(3\): 298-301.](#)

[Laupland, K. B., T. Ross, et al. \(2007\). "Investigation of sources of potential bias in laboratory surveillance for anti-microbial resistance." \*Clin Invest Med\* \*\*30\*\*\(4\): E159-166.](#)

[McConnell, J. \(2004\). "Giving identity to the faceless threat of antibiotic resistance." \*Lancet Infect Dis\* \*\*4\*\*\(6\): 325.](#)

[Sahm DF, Marsilio MK, Piazza G. \(1999\). "Antimicrobial resistance in key bloodstream bacterial isolates: electronic surveillance with the surveillance network database—USA". \*Clin Infect Dis\*. 1999;29 \(1\):259–63.](#)

[Taur, J. and Smith, M. A. \(2007\). "Adherence to the Infectious Diseases Society of America Guidelines in the Treatment of Uncomplicated Urinary Tract Infection". \*Clin Infect Dis\*. 44\(6\): 769-774 doi:10.1086/511866](#)

**Deleted:** Cooke R. Experts in Uncertainty: Opinion and Subjective Probability in Science. Oxford: Oxford University Press; 1991.¶  
 ECDC [Internet]. "Antimicrobial resistance surveillance in Europe 2009." *Annual report of the European Antimicrobial Resistance Surveillance Network (EARS-Net)*. Stockholm: European Centre for Disease Prevention and Control; 2010 [updated 2010 Nov 24; cited 2011 Jan 16]. Available from: [http://www.ecdc.europa.eu/en/publications/Publications/1011\\_SUR\\_annual\\_EARS\\_Net\\_2009.pdf](http://www.ecdc.europa.eu/en/publications/Publications/1011_SUR_annual_EARS_Net_2009.pdf)¶  
 Khan W, Ross S, Rodriguez W, Controni G, and Saz AK. Haemophilus influenzae type B resistant to ampicillin. A report of two cases. *Jama*. 1974; **229**(3): 298-301.¶  
 Laupland KB, Ross T, Pitout JD, Church DL, and Gregson DB. Investigation of sources of potential bias in laboratory surveillance for anti-microbial resistance. *Clin Invest Med*. 2007; **30**(4): E159-166.¶  
 McConnell, J. Giving identity to the faceless threat of antibiotic resistance. *Lancet Infect Dis*. 2004 Jun; **4**(6): 325.¶  
 ¶  
 ¶  
 ¶  
 ¶

**Formatted:** Not Raised by / Lowered by

**Formatted:** Indent: Left: 0 pt

**Formatted:** Not Raised by / Lowered by

**Formatted:** Not Raised by / Lowered by

**Formatted:** Indent: Left: 0 pt

**Formatted:** Not Raised by / Lowered by



Figure 1a: Resistance rates of *Acinetobacter* spp. to four antibiotic classes in the United States, 1999–2006

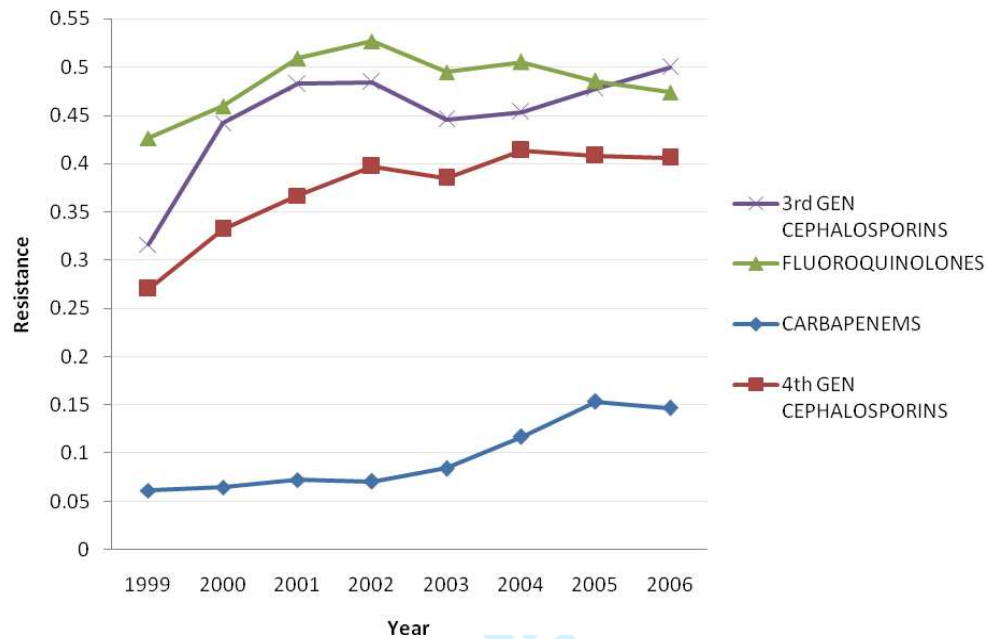

Deleted: trends

Deleted: six antibiotics

Deleted: US

Note: The following drugs were used to test for resistance to antibiotic classes: 3<sup>rd</sup> generation cephalosporins - ceftriaxone, ceftazidime; fluoroquinolones - ciprofloxacin, levofloxacin; carbapenems - imipenem; 4<sup>th</sup> generation cephalosporins - cefepime;

Source: Author's calculations using susceptibility data from The Surveillance Network® (TSN)

Figure 1b: Resistance rates of *Escherichia coli* to eight antibiotic classes in the United States, 1999–2006

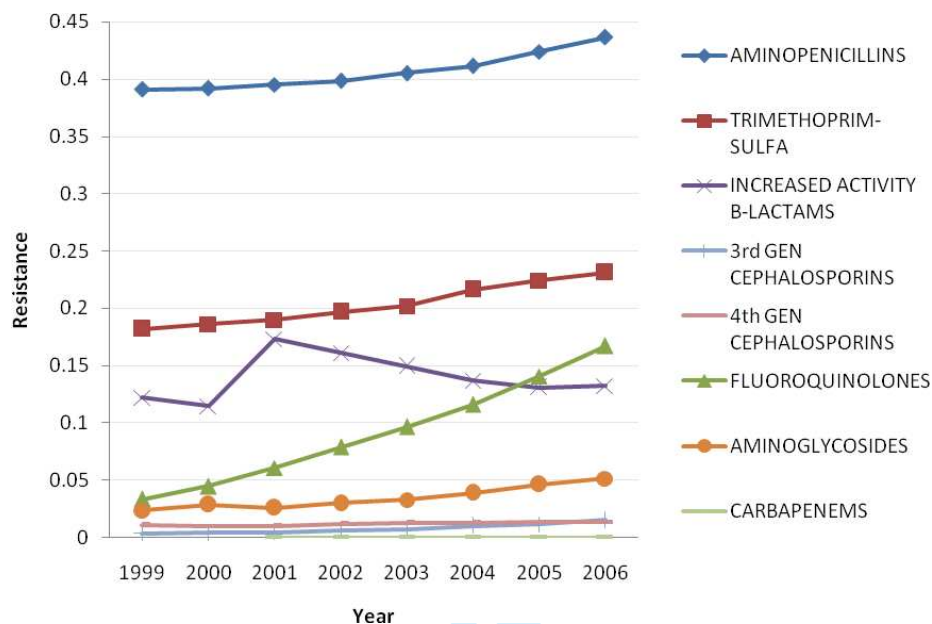

Note: The following drugs were used to test for resistance to antibiotic classes: aminopenicillins – ampicillin; trimethoprim-sulfa – co-trimoxazole; increased activity beta-lactams – ampicillin/sulbactam, aztreonam, piperacillin; 3<sup>rd</sup> generation cephalosporins - ceftriaxone, ceftazidime; 4<sup>th</sup> generation cephalosporins – cefepime; fluoroquinolones - ciprofloxacin, levofloxacin; aminoglycosides – gentamicin, tobramycin; carbapenems – imipenem;

Source: Author’s calculations using susceptibility data from The Surveillance Network® (TSN)

Deleted: trends

Deleted: thirteen antibiotics in US

Formatted: Lowered by 14 pt

Deleted: ¶

Review only

Figure 2a: Proportions of most-common antibiotic classes used to treat infections caused by *Acinetobacter* spp. in the United States, 1999–2006.

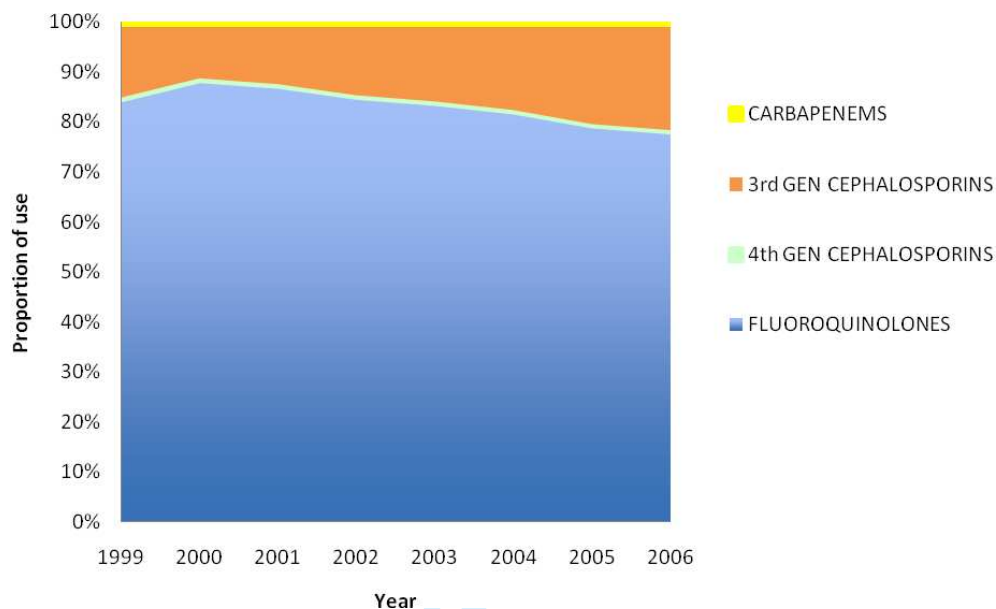

Deleted: antibiotics  
Deleted: US (  
Deleted: )

Source: Author's calculations with prescription data derived from IMS Health Xponent™ January 1999-December 2007, IMS Health Incorporated.

Peer review only

Figure 2b: Proportions of most-common antibiotic classes used to treat infections caused by *E. coli* in the United States, 1999–2006

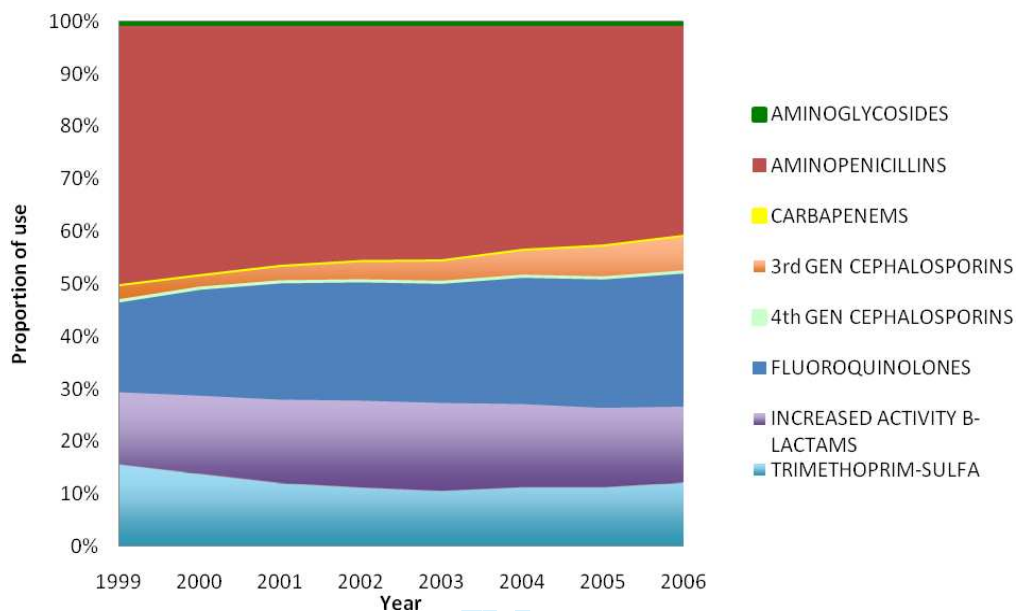

Deleted: antibiotics

Deleted: US

Deleted: ¶

Source: Author's calculations with prescription data derived from IMS Health Xponent™ January 1999-December 2007, IMS Health Incorporated.

For peer review only

Figure 3: Static- and adaptive use DRIs for *Acinetobacter* spp. and *E. coli* in the United States, 1999–2006

Deleted: resistance indices  
 Deleted: for US  
 Deleted: ¶

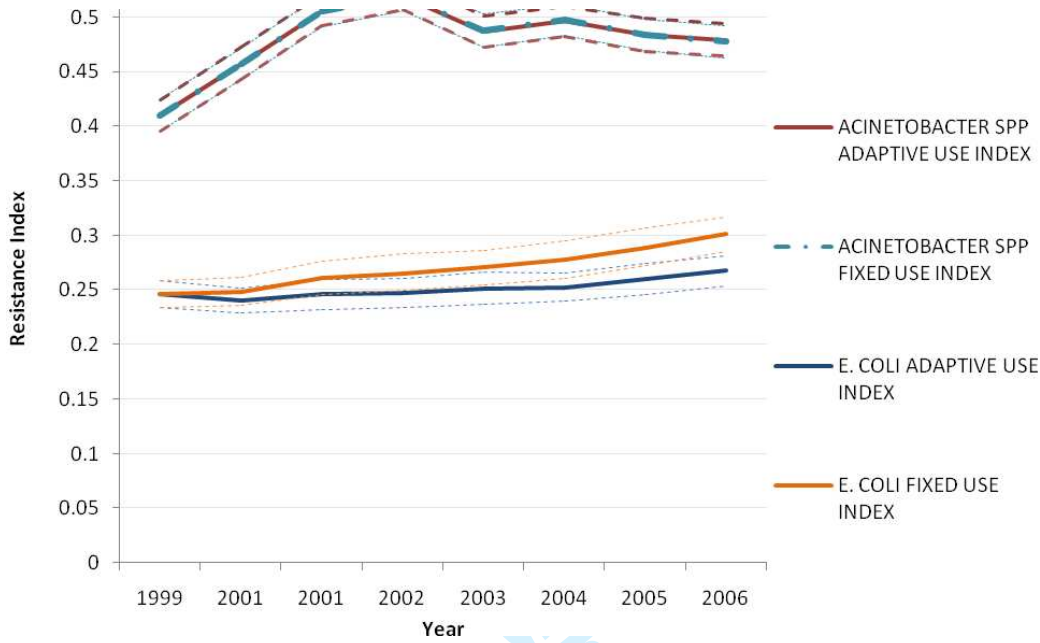

Note: Dotted lines represent 95% confidence intervals (CIs); CIs for resistance and use proportion components derived using a bootstrap method with m=1000 simulations. A t-test showed that the difference of means from the bootstrap distribution was statistically significant at 1% level

Source: Author's calculations using susceptibility data from The Surveillance Network® (TSN) and prescription data derived from IMS Health Xponent™ January 1999-December 2007, IMS Health Incorporated.

Figure 4: Adaptive DRIs for first-line therapy *E. coli* in the United States, 1999–2006

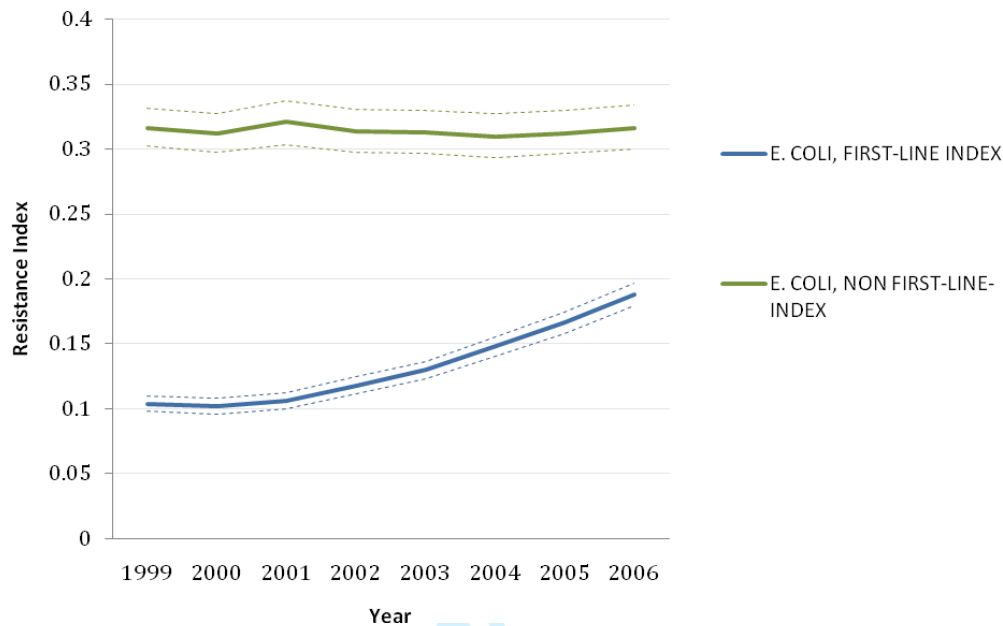

Note: a) Dotted lines represent 95% confidence intervals (CIs): CIs for resistance and use proportion components derived using a bootstrap method with m=1000 simulations.

b) Trimethoprim-sulfa and oral fluoroquinolones used as first-line therapies against *E. coli* urinary tract infections based on Taur and Smith (2007)

Source: Author's calculations using susceptibility data from The Surveillance Network® (TSN) and prescription data derived from IMS Health Xponent™ January 1999-December 2007, IMS Health Incorporated.

**Deleted:** Antibiotic effectiveness indices  
**Deleted:** for *Acinetobacter* spp. and  
**Deleted:** US  
**Formatted:** Font: Not Italic  
**Deleted:** ¶  
**Note:** First

**Formatted:** Font: 10 pt, Not Italic  
**Deleted:** for  
**Formatted:** Font: 10 pt, Not Italic  
**Deleted:** are  
**Formatted:** Font: 10 pt, Not Italic  
**Deleted:** guidelines used at the University of Maryland Medical Center.<sup>1</sup>  
**Formatted:** Font: 10 pt

Figure 5: Adaptive affordability DRIs for *E. coli* in the United States, 1999–2006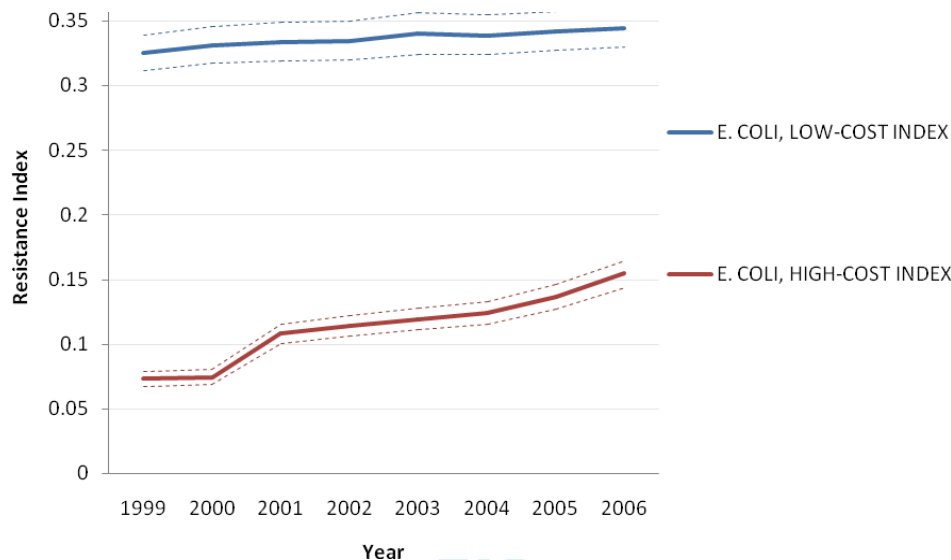

Note: a) Dotted lines represent 95% confidence intervals (CIs): CIs for resistance and use proportion components derived using a bootstrap method with  $m=1000$  simulations.

b) Low and high cost indices are based on daily cost at or under \$30 and exceeding \$30, respectively. Cheap drug classes include aminoglycosides, aminopenicillins, 3<sup>rd</sup> generation cephalosporins and trimethoprim-sulfamethoxazole; expensive drug classes include 4<sup>th</sup> generation cephalosporins, carbapenems, fluoroquinolones and increased activity beta-lactams.

Daily drug cost data were obtained from Cornell University's Weill Medical College.<sup>2</sup>

Source: Author's calculations using susceptibility data from The Surveillance Network® (TSN) and prescription data derived from IMS Health Xponent™ January 1999-December 2007, IMS Health Incorporate

<sup>2</sup> <http://www-users.med.cornell.edu/~spon/picu/referenc/abxcost.htm>. Accessed in December 2010

Deleted: indices

Deleted: *Acinetobacter* spp. and

Deleted: US

Formatted: No underline

Deleted: Note: Cheap and expensive

Deleted: 10

Formatted: Font: 10 pt, Not Italic

Deleted: 10,

Deleted: , in the case of *Escherichia coli*. For *E. coli*, cheap drugs

Formatted: Font: 10 pt, Not Italic

Formatted: Font: 10 pt, Not Italic

Formatted: Font: 10 pt, Not Italic

Deleted: ampicillin, gentamicin and

Deleted: -trimethoprim, cefazolin and tobramycin

Formatted: Font: 10 pt, Not Italic

Deleted: drugs

Formatted: Font: 10 pt, Not Italic

Deleted: ampicillin/sulbactam, aztreonam, ceftazidime, ciprofloxacin, imipenem, nitrofurantoin, and piperacillin. Cheap and expensive indices are based on daily cost at or under \$100 and exceeding \$100, respectively, in the case of *Acinetobacter* species. For *Acinetobacter* spp., cheap drugs were cefepime, ceftazidime, ceftriaxone and ciprofloxacin; expensive drugs include imipenem.

Formatted: Font: 10 pt, Not Italic

Formatted: Font: 10 pt, Not Italic

Formatted: Font: 10 pt, Not Italic

Formatted: Font: Not Italic

Deleted:

Deleted: <http://www-users.med.cornell.edu/~spon/picu/referenc/abxcost.htm>.

Formatted

1  
2  
3  
4  
5  
6  
7  
8  
9  
10  
11  
12  
13  
14  
15  
16  
17  
18  
19  
20  
21  
22  
23  
24  
25  
26  
27  
28  
29  
30  
31  
32  
33  
34  
35  
36  
37  
38  
39  
40  
41  
42  
43  
44  
45  
46  
47  
48  
49  
50  
51  
52  
53  
54  
55  
56  
57  
58  
59  
60

For peer review only



1  
2  
3 **Page 1: [1] Deleted** **Revision** **8/31/2011 4:49:00 PM**

4 , Center for Disease Dynamics, Economics & Policy, 1616 P Street NW, Suite 600,  
5  
6 Washington, DC 20036, Telephone: 202--328--5085, Fax: 202--939--3460, E-mail:  
7  
8 [ramanan@cddep.org](mailto:ramanan@cddep.org).

9  
10  
11 **Reprints:** Reprints are not available from authors.

12  
13  
14  
15 Left running head: LAXMINARAYAN AND OTHERS

16  
17 **Page 3: [2] Deleted** **Revision** **8/31/2011 4:49:00 PM**

18 The institutions that supported this work had no role in study conception, data  
19  
20 collection, analysis and interpretation, and writing of the manuscript. All authors  
21  
22 had full access to the data. RL, HG and KK had the final responsibility for the  
23  
24 decision to submit for publication.  
25  
26  
27  
28  
29  
30  
31

32 **Conflict of interest statement**  
33  
34  
35  
36  
37  
38  
39  
40  
41  
42  
43  
44  
45  
46  
47  
48  
49  
50  
51  
52  
53  
54  
55  
56  
57  
58  
59  
60

BMJ Open

1  
2  
3  
4  
5  
6  
7  
8  
9  
10  
11  
12  
13  
14  
15  
16  
17  
18  
19  
20  
21  
22

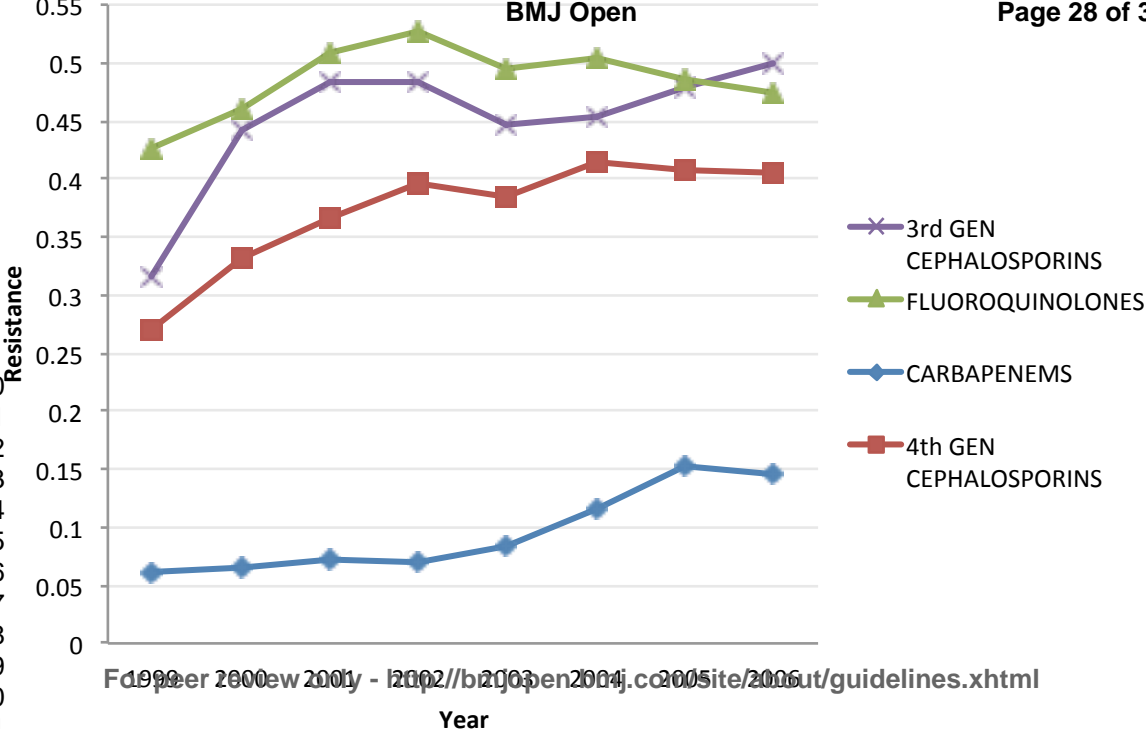

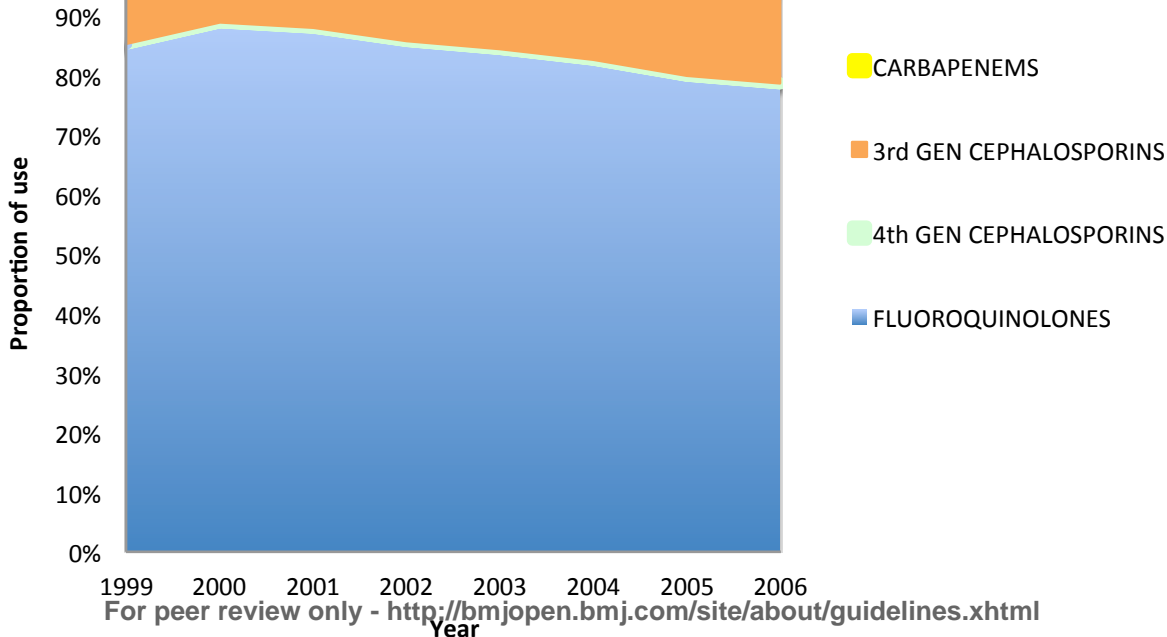

## BMJ Open

1  
2  
3  
4  
5  
6  
7  
8  
9  
10  
11  
12  
13  
14  
15  
16  
17  
18  
19  
20  
21  
22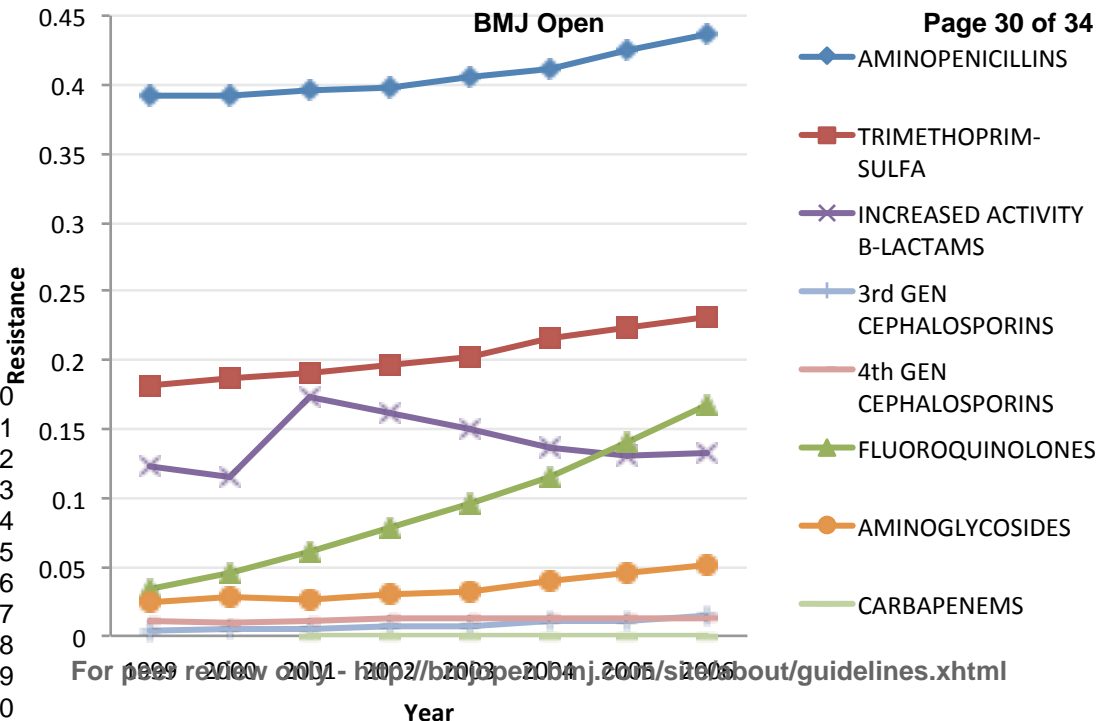

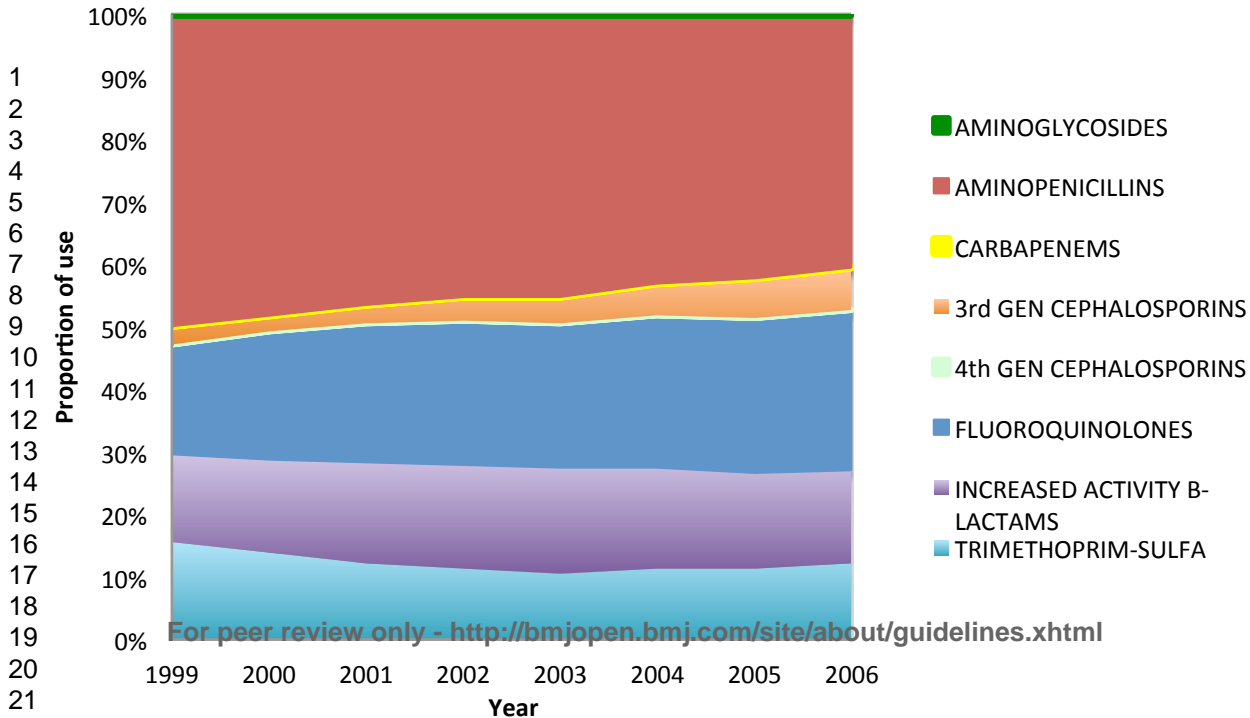

For peer review only - <http://bmjopen.bmj.com/site/about/guidelines.xhtml>

1  
2  
3  
4  
5  
6  
7  
8  
9  
10  
11  
12  
13  
14  
15  
16  
17  
18  
19  
20  
21  
22  
23

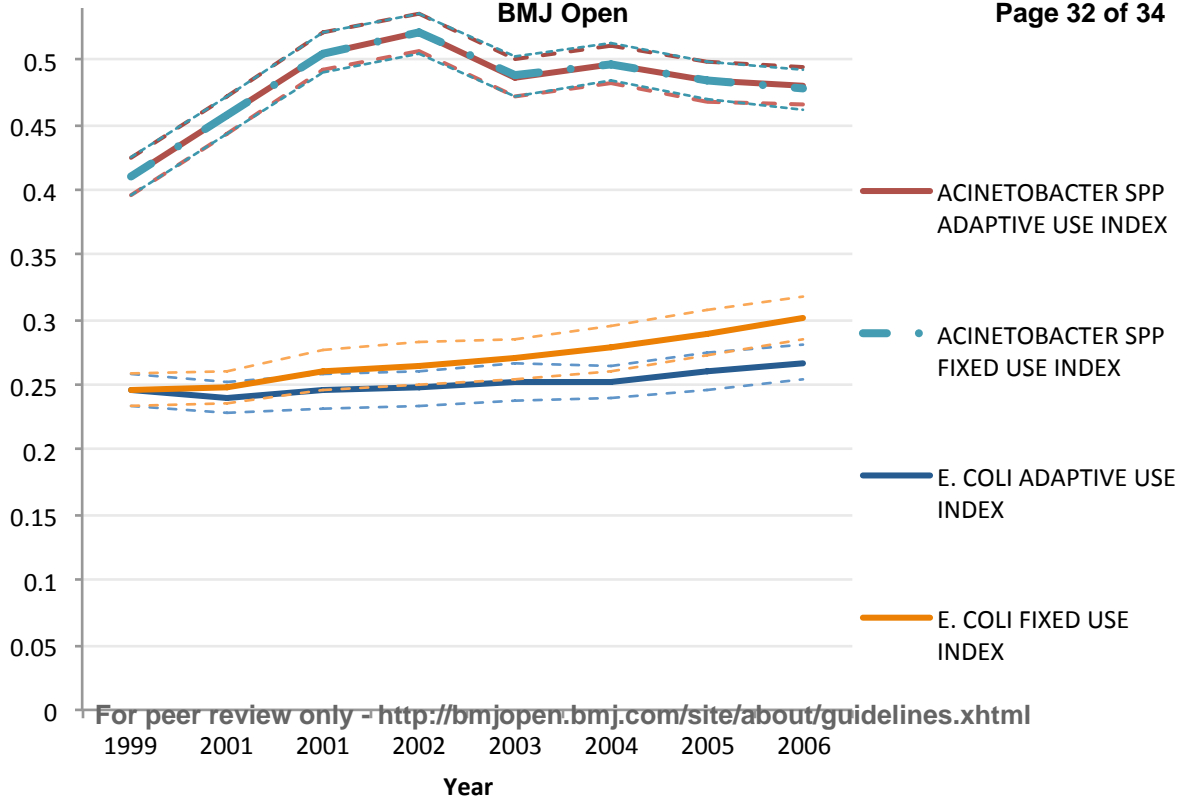

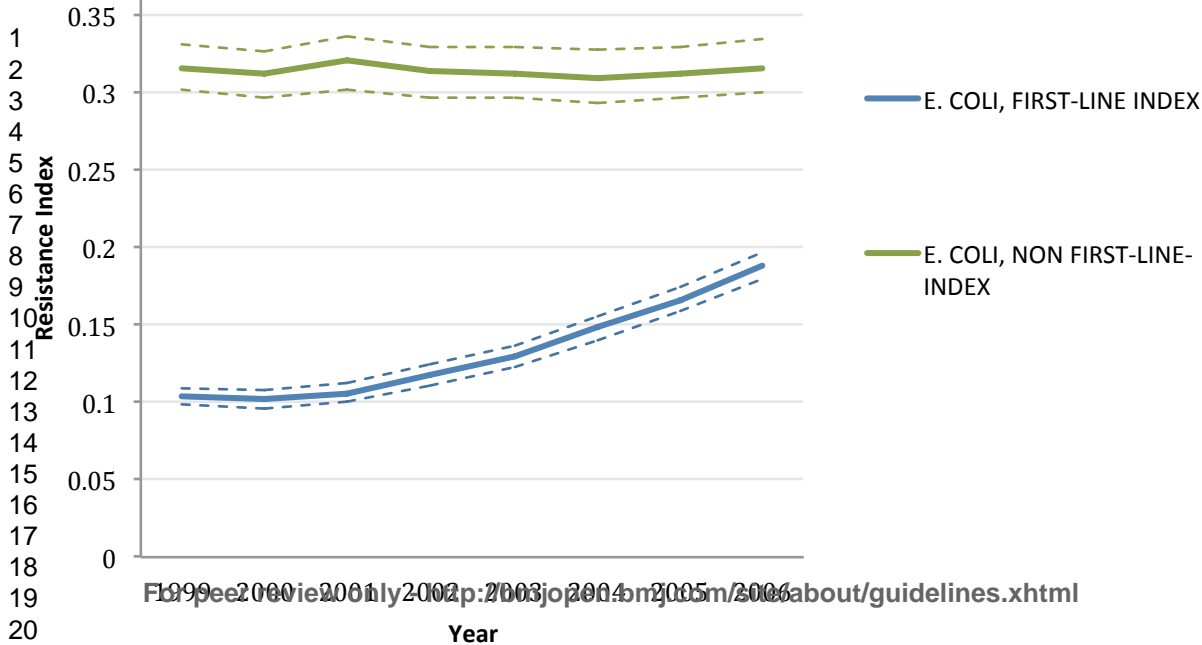

Supplement: bmjopen-2011-000135.draft_revisions.pdf [file bmjopen-2011-000135.draft_revisions.pdf]
